# Supplementary material for: GCAM-USA v5.3_water_dispatch: Integrated modeling of subnational U.S. energy, water, and land systems within a global framework
Source: Copernicus journal article supplement (doi:10.5194/gmd-2021-197), 2021-07-06
Supplement: Supplementary file [file gmd-2021-197-AC1-supplement.pdf]

# GCAM-USA v5.3\_water\_dispatch: Integrated modeling of subnational U.S. energy, water, and land systems within a global framework

Matthew Binsted<sup>1</sup>, Gokul Iyer<sup>1</sup>, Pralit Patel<sup>1</sup>, Neal Graham<sup>1</sup>, Yang Ou<sup>1</sup>, Zarrar Khan<sup>1</sup>, Nazar Kholod<sup>1</sup>, Kanishka Narayan<sup>1</sup>, Mohamad Hejazi<sup>1</sup>, Son Kim<sup>1</sup>, Katherine Calvin<sup>1</sup>, Marshall Wise<sup>1</sup>

<sup>1</sup>Joint Global Change Research Institute (Pacific Northwest National Laboratory and University of Maryland), 5825 University Research Court, Suite 3500, College Park, MD 20740, USA.

*Correspondence to:* Matthew Binsted. Email: [matthew.binsted@pnnl.gov](mailto:matthew.binsted@pnnl.gov). Phone: +1 301-405-5353. Address: 5825 University Research Court, Suite 3500, College Park, MD 20740.

## Supplementary Materials

### Supplementary Note 1: Electricity trade in GCAM-USA

In GCAM-USA, states are grouped into 15 grid-regions representing electricity market and planning areas which roughly correspond to the North American Electric Reliability Corporation (NERC) Assessment Areas. Within these grid-regions, investment in new generation capacity in GCAM-USA is driven by economic competition (based on the cost of new power plants in each state) but influenced by the historical pattern of power-sector infrastructure investments. Electricity supplies and demands are resolved at the grid-region level; states within a given grid region are assumed to trade electricity freely (without constraint) and pay a common electricity price. By default, the load profile is fixed over time, and generation in each sub-annual load segment is met from generators across all states within that grid on the basis of least cost competition.

At a national level, electricity trade between grid regions occurs but is assumed to be limited by the availability of long-distance transmission infrastructure. In the GCAM-USA Reference scenario, development of new long-distance transmission infrastructure is assumed to be limited by numerous institutional constraints; inter-grid electricity trade is not expected to deviate significantly from historical levels. Inter-grid electricity trade is represented only at the annual temporal scale – the sub-annual load profile of imports or exports is not represented. Net interregional trade is calibrated to historical levels to reflect existing economic conditions as well as implied physical transmission capability. Although inter-grid electricity trade can change from calibrated levels in future modeling periods as relative regional electricity prices change, the nonlinear formulation means that the relative ease or elasticity of expanding these imports in a region tightens as the share of imports increases from the calibrated historical shares. In other words, an increasing differential in regional prices is required to expand trade, reflecting an increasing marginal cost of building and maintaining expanded transmission infrastructure.

## Supplementary Note 2: Variable energy integration – capacity factors

35 An important factor affecting the construction and operation of variable (non-dispatchable) generating units is that their resource bases within a given state are heterogeneous (wind and solar potentials are represented at the state level in GCAM-USA). Some areas have higher quality resources which translate to higher capacity factors, while other less sunny or windy areas are still potentially suitable for development but will sustain operation for fewer hours of the year.

40 Variable resource potentials, specifically onshore wind, offshore wind, photovoltaic (PV) solar, and concentrating solar power (CSP), are represented by resource supply curves in GCAM-USA. These resource curves are comprised of various grades, each containing a quantity of resource available and the capacity factor at which that resource is capable of operating. As deployment of these variable energy technologies increases, utilization moves up the  
45 resource supply curve to grades with lower capacity factors (sites with the highest capacity factors are assumed to be utilized first). The capacity factor derived from the resource curve is then used to inform both investment and operation decisions in the GCAM-USA power sector.

The resource curves for solar PV and onshore wind in each state are presented below as Figure SN2.1. These curves  
50 are developed utilizing data from the Regional Energy Deployment System (ReEDS) model – specifically resource potential, grid connection costs, and hourly capacity factor for multiple “resource regions” and resource classes within each state. The hourly capacity factor data are aggregated to annual average capacity factors, mapped to resource potential, and sorted from highest capacity to lowest capacity factor, generating the resource curves depicted in Figure SN2.1. (The same hourly capacity factor data are used to generate the segment capacity factors – i.e., the capacity  
55 factor specific to each monthly day/night dispatch segment – for each resource and state.) Grid connection costs are included in the model as a separate cost component (considered in investment decisions only). Concentrating solar power and offshore wind resources are represented in the same way (also using data from ReEDS), although not every state has these resources.

60 On the investment side, the capacity factor passed from the resource curve is used to levelize all fixed costs (capital costs, fixed O&M) for the current period’s technology vintage. Thus, as deployment of a given variable energy technology increases, the levelized cost of electricity from that technology becomes marginally more expensive (assuming constant cost and efficiency characteristics) because the new capacity is expected to have a lower capacity factor, and thus produce less electricity per unit of capacity, than generation units invested at lower levels of  
65 deployment. This dynamic is also reflected on the operation (dispatch) side of the power sector, where the generation potential of VRE capacity is depreciated to reflect this diminishing capacity factor. Thus, technology vintages invested in later periods will tend to have lower generation per unit of capacity because these newer generating units are installed in locations with lower quality wind or solar resources.

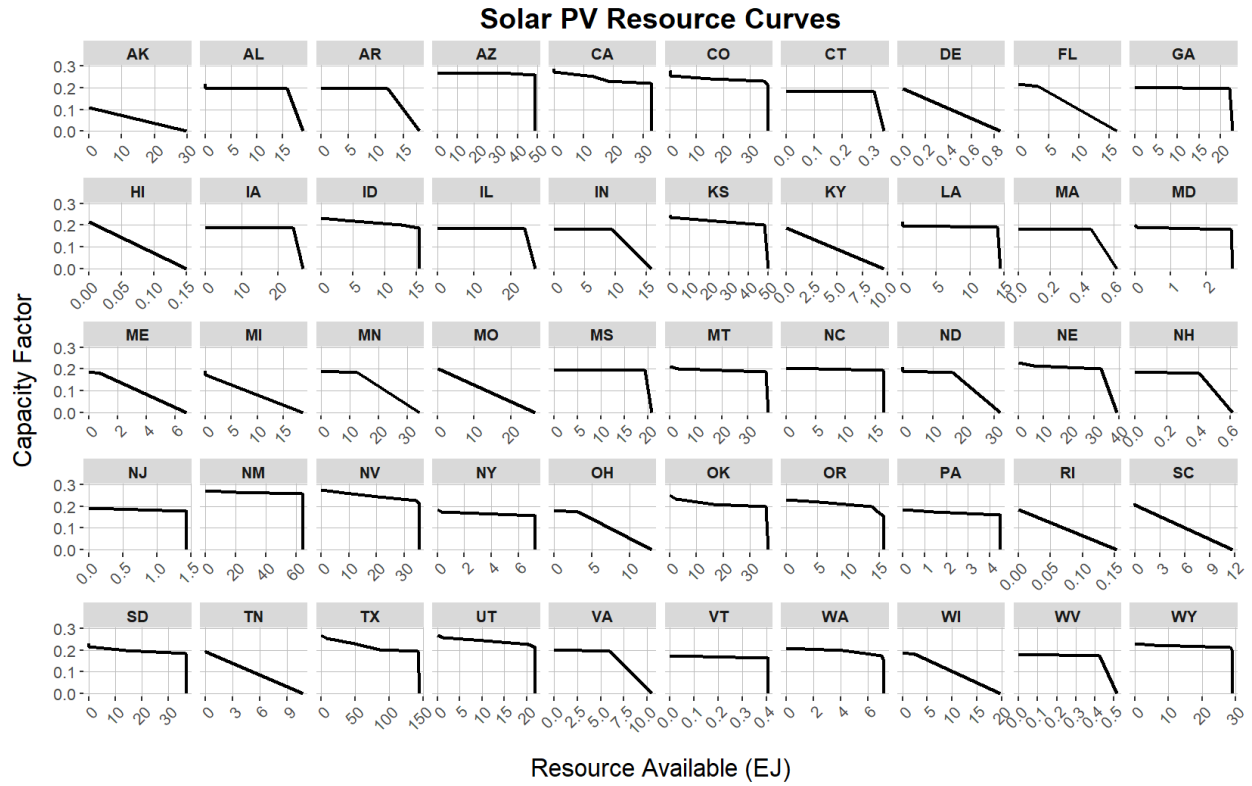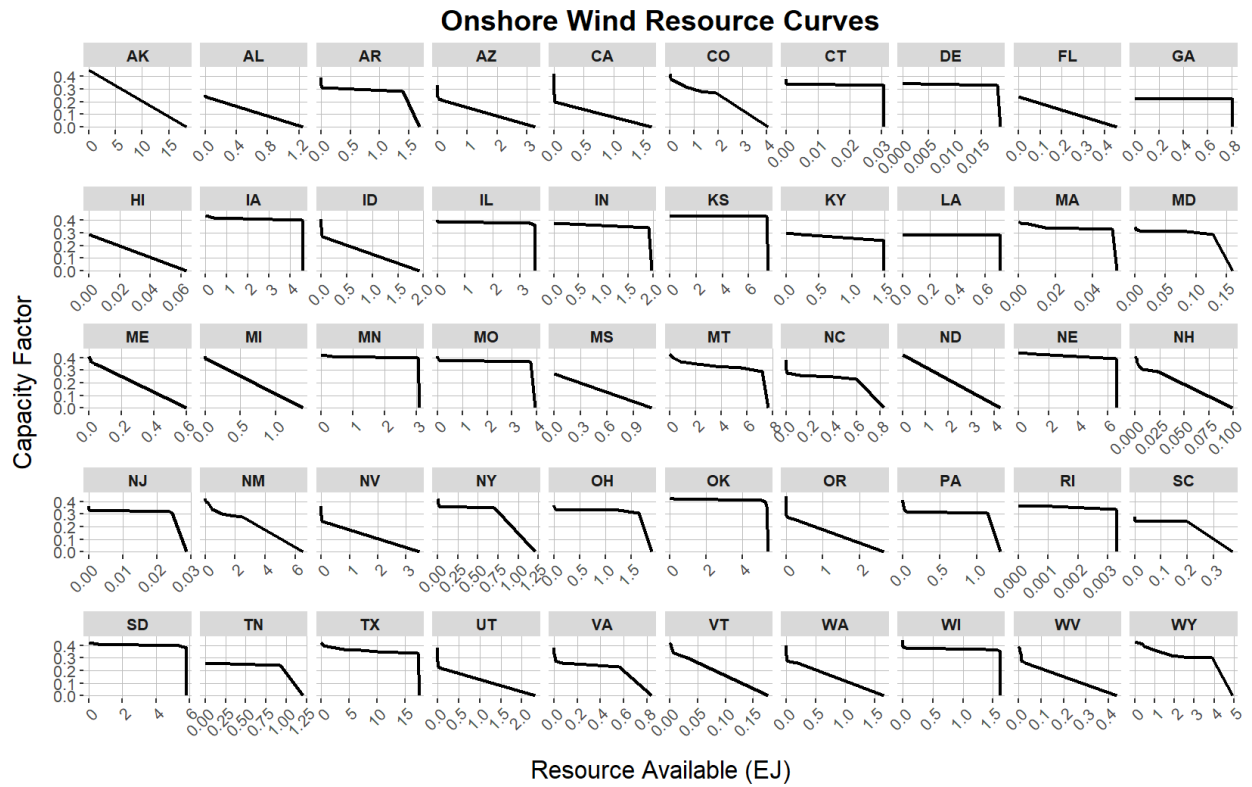

**Figure SN2.1. Solar PV (top) and onshore wind (bottom) resource curves. Annual capacity factor (y-axis) decreases as resource deployment (x-axis) increases.**

**Supplementary Note 3: End-use Sector Energy and Service Demands**

The GCAM-USA Reference scenario entails steady population and economic growth throughout the 21<sup>st</sup> century at a national level, with population increasing 40% relative to 2015 and GDP nearly quadrupling. These macroeconomic drivers drive growth in demand for energy services (passenger kilometers traveled, building floorspace which drives space heating and cooling demands, etc.), which are translated into demands for final energy carriers to provide those services in each sector. Generally, GCAM-USA by default includes conservative assumptions about energy efficiency policies. For example, building sector technologies reflect a continuation, but not an expansion or strengthening, of current energy efficiency policies (e.g., building efficiency standards); vehicle efficiencies assume marginal future efficiency gains but not significant strengthening of Corporate Average Fuel Economy (CAFE) standards.

Economic growth in the GCAM-USA Reference scenario far outpaces energy service demands, which outpace final energy demands. On net, total final energy demands increase across sectors as efficiency improvements are slower than increases in demand for end-use energy services (industrial output, space heating and cooling driven by increased building floorspace, passenger and freight transportation, etc.), although the relative balance between population and income driven demand growth and energy efficiency vary by sector. Broadly, the GCAM-USA Reference scenario represents a plausible future evolution of the USA energy, water, and land systems absent significant changes in policy or energy efficiency (Binsted et al., 2020). Alternate scenarios with more stringent energy efficiency or policy assumptions can be compared against this counterfactual reference scenario; individual model users can also modify the reference scenario to reflect evolving technology, policy, or behavioral trends at the national or subnational level.

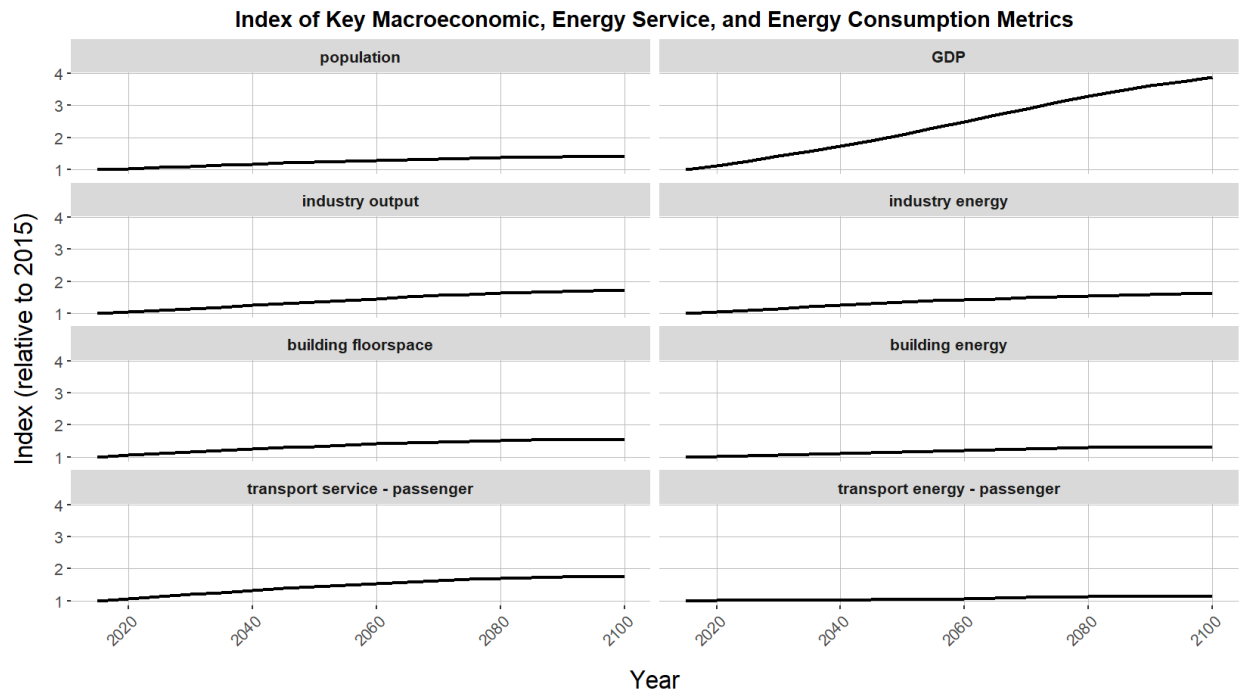

**Figure SN3.1. Key macroeconomic drivers (population, GDP), energy service indicators (industry output, building floorspace, vehicle km traveled), and energy consumption metrics indexed to 2015 values (2015 = 1).**

#### Supplementary Note 4: Transportation Sector Assumptions and Alternate Scenarios

The GCAM-USA Reference scenario does not reflect subnational transportation policies (energy efficiency, emissions, etc.) or regionally differentiated consumer preferences for alternate drivetrains (electric vehicles (EVs), hydrogen fuel cell electric vehicles (FCEVs), etc.). Vehicle costs are the same in every state (non-energy technology costs are homogenous across states for all sectors in GCAM-USA). Electric vehicle penetration is virtually zero in the historical period (2015); thus, the model has little information about varying regional preferences for EVs around which to calibrate. Given the absence of historical regional consumer preferences for alternate drivetrains or state-level ZEV mandates in the model, the transportation energy mix in GCAM-USA tends to evolve more homogeneously across states compared to other sectors. Nevertheless, GCAM-USA contains several levers for representing regional transportation dynamics/policies, including:

- Technology costs and efficiencies. Non-energy costs (predominantly purchase price but also reflecting registration and insurance, tolls, maintenance, and infrastructure costs) and fuel efficiencies can be adjusted by vehicle type (drivetrain), size class and state,
- Subsidies for low-carbon vehicles. Subsidies such as federal and state tax credits for electric vehicles can be implemented as additional (negative) non-energy costs by vehicle type (drivetrain), size class and state.
- Vehicle sales standards. Policies such as California's Zero-Emission Vehicle (ZEV) program, can be implemented by state (and vehicle size class, if desired). See <http://jgcri.github.io/gcam-doc/policies.html#energy-production-policies> for additional information on energy production policies in GCAM. In this case the model will calculate an implicit subsidy required to reach the specified sales share.
- Consumer preferences for alternate drivetrains. States may vary in terms of their preference for alternate drivetrains such as BEVs, which could be influenced by many factors (including, for example, regional differences in availability of charging infrastructure). The share-weights which reflect non-cost factors influencing technology deployment of transportation technologies can be adjusted by vehicle size class and state, (See Table SM5 for default assumptions.)

**Table SM1: GCAM-USA Model Overview (Reference Card)**

- 125 The following tables provide a high-level overview of GCAM-USA. The table format is based upon, and draws heavily from, the Integrated Assessment Modelling Consortium (IAMC) wiki ([https://www.iamcdocumentation.eu/index.php/IAMC\\_wiki](https://www.iamcdocumentation.eu/index.php/IAMC_wiki)) Reference Card format. For readability, the table is split into six parts:
- Table SM1A: Model scope and methods
  - Table SM1B: Socio-economic drivers and macro-economy
  - Table SM1C: Energy Supply and Transformation
  - Table SM1D: Energy end-use
  - Table SM1E: Land use
  - Table SM1F: Emissions, climate, and impacts
- 130

**Table SM1A: Model scope and methods**

| Dimension          | Sub-Dimension | Endogenous | Exogenous | Not Included | Details                                                                                                                                                                                                                                                                                                                                                                                                                                                                                                                                                                                                                                                 |
|--------------------|---------------|------------|-----------|--------------|---------------------------------------------------------------------------------------------------------------------------------------------------------------------------------------------------------------------------------------------------------------------------------------------------------------------------------------------------------------------------------------------------------------------------------------------------------------------------------------------------------------------------------------------------------------------------------------------------------------------------------------------------------|
| Model type         |               |            |           |              | global multisector model                                                                                                                                                                                                                                                                                                                                                                                                                                                                                                                                                                                                                                |
| Geographical scope |               |            |           |              | global                                                                                                                                                                                                                                                                                                                                                                                                                                                                                                                                                                                                                                                  |
| Objective          |               |            |           |              | GCAM-USA is an integrated, multi-sector model that explores interactions between human and Earth systems. The model links representations of economic, energy, water, and land systems in a consistent global framework; it is computationally efficient enough to run on a personal computer or allow for broad scenario and uncertainty exploration. GCAM-USA is an economic model that operates in physical quantities (EJ of energy, cubic km of water, square km of land, etc.); individual modules are process-based and reflect the latest science on key system dynamics but operate at lower levels of detail than individual sectoral models. |
| Solution concept   |               |            |           |              | Partial equilibrium (price elastic demand)                                                                                                                                                                                                                                                                                                                                                                                                                                                                                                                                                                                                              |
| Solution horizon   |               |            |           |              | Recursive dynamic (myopic)                                                                                                                                                                                                                                                                                                                                                                                                                                                                                                                                                                                                                              |
| Anticipation       |               |            |           |              | GCAM-USA is a dynamic recursive model; decision-makers make choices based on present conditions (prices, policies, etc.) without knowledge of future circumstances. Decisions in one period impact conditions in the next through resource depletion, capital stock investments and retirements, land-use changes, etc.                                                                                                                                                                                                                                                                                                                                 |

|                   |                                 |   |  |                                                                                                                                                                                                                                                                                                                                                                                                                                                                                                                         |
|-------------------|---------------------------------|---|--|-------------------------------------------------------------------------------------------------------------------------------------------------------------------------------------------------------------------------------------------------------------------------------------------------------------------------------------------------------------------------------------------------------------------------------------------------------------------------------------------------------------------------|
| Spatial Dimension |                                 |   |  | <p>GCAM-USA divides the world into 32 geopolitical regions (the scale at which energy and economy are represented), 235 water basins, and 384 land-use regions.</p> <p>The USA energy and economic systems are further disaggregated into 50 states plus the District of Columbia (51 “state-level regions”). Twenty-three of the water basins and land-use regions fall at least partially within the United States. GCAM-USA also aggregates the states into 15 “grid regions” among which electricity is traded.</p> |
| Policies          | Emission tax                    | x |  |                                                                                                                                                                                                                                                                                                                                                                                                                                                                                                                         |
|                   | Emission pricing                | x |  |                                                                                                                                                                                                                                                                                                                                                                                                                                                                                                                         |
|                   | Cap and trade                   | x |  |                                                                                                                                                                                                                                                                                                                                                                                                                                                                                                                         |
|                   | Fuel taxes                      | x |  |                                                                                                                                                                                                                                                                                                                                                                                                                                                                                                                         |
|                   | Fuel subsidies                  | x |  |                                                                                                                                                                                                                                                                                                                                                                                                                                                                                                                         |
|                   | Feed-in-tariff                  | x |  |                                                                                                                                                                                                                                                                                                                                                                                                                                                                                                                         |
|                   | Portfolio standard              | x |  |                                                                                                                                                                                                                                                                                                                                                                                                                                                                                                                         |
|                   | Capacity targets                | x |  |                                                                                                                                                                                                                                                                                                                                                                                                                                                                                                                         |
|                   | Emission standards              | x |  |                                                                                                                                                                                                                                                                                                                                                                                                                                                                                                                         |
|                   | Energy efficiency standards     | x |  |                                                                                                                                                                                                                                                                                                                                                                                                                                                                                                                         |
|                   | Agricultural producer subsidies | x |  |                                                                                                                                                                                                                                                                                                                                                                                                                                                                                                                         |
|                   | Agricultural consumer subsidies | x |  |                                                                                                                                                                                                                                                                                                                                                                                                                                                                                                                         |
|                   | Land protection                 | x |  |                                                                                                                                                                                                                                                                                                                                                                                                                                                                                                                         |
|                   | Pricing carbon stocks           | x |  |                                                                                                                                                                                                                                                                                                                                                                                                                                                                                                                         |

**Table SM1B: Socio-economic drivers and macro-economy**

| Dimension                           | Sub-Dimension                                   | Endogenous | Exogenous | Not Included | Details                                                                                                                                                                                                                                                                                                                                                                               |
|-------------------------------------|-------------------------------------------------|------------|-----------|--------------|---------------------------------------------------------------------------------------------------------------------------------------------------------------------------------------------------------------------------------------------------------------------------------------------------------------------------------------------------------------------------------------|
| Population                          |                                                 |            | x         |              |                                                                                                                                                                                                                                                                                                                                                                                       |
| Population age structure            |                                                 |            |           | x            |                                                                                                                                                                                                                                                                                                                                                                                       |
| Education level                     |                                                 |            |           | x            |                                                                                                                                                                                                                                                                                                                                                                                       |
| Urbanization rate                   |                                                 |            |           | x            |                                                                                                                                                                                                                                                                                                                                                                                       |
| GDP                                 |                                                 |            | x         |              |                                                                                                                                                                                                                                                                                                                                                                                       |
| Income distribution                 |                                                 |            |           | x            | Can be included; not included by default                                                                                                                                                                                                                                                                                                                                              |
| Employment rate                     |                                                 |            | x         |              |                                                                                                                                                                                                                                                                                                                                                                                       |
| Labor productivity                  |                                                 |            | x         |              |                                                                                                                                                                                                                                                                                                                                                                                       |
| Total factor productivity           |                                                 |            | x         |              |                                                                                                                                                                                                                                                                                                                                                                                       |
| Economic sectors                    |                                                 |            |           |              | Energy, industry, transportation, residential, commercial, agriculture, forestry                                                                                                                                                                                                                                                                                                      |
| Trade                               | Coal                                            | x          |           |              | Heckscher-Ohlin (H-O) / Armington hybrid                                                                                                                                                                                                                                                                                                                                              |
|                                     | Oil                                             | x          |           |              | Heckscher-Ohlin (H-O) / Armington hybrid                                                                                                                                                                                                                                                                                                                                              |
|                                     | Gas                                             | x          |           |              | Heckscher-Ohlin (H-O) / Armington hybrid                                                                                                                                                                                                                                                                                                                                              |
|                                     | Uranium                                         | x          |           |              | Heckscher-Ohlin (H-O)                                                                                                                                                                                                                                                                                                                                                                 |
|                                     | Electricity                                     | x          |           | x            | Electricity is not traded between GCAM's 32 core energy-economic regions. However, electricity is freely traded between U.S. state-level regions in the same grid region (GCAM-USA contains 15 grid regions) and traded on a more limited basis between grid regions. For more information on electricity trade in GCAM-USA, see Supplementary Note 1: Electricity trade in GCAM-USA. |
|                                     | Bioenergy crops                                 | x          |           |              |                                                                                                                                                                                                                                                                                                                                                                                       |
|                                     | Food crops                                      | x          |           |              |                                                                                                                                                                                                                                                                                                                                                                                       |
|                                     | Emissions                                       | x          |           |              | Emissions markets can be set up to permit or restrict trading.                                                                                                                                                                                                                                                                                                                        |
| Institutional and political factors | Early retirement of capital allowed             | x          |           |              |                                                                                                                                                                                                                                                                                                                                                                                       |
|                                     | Interest rates differentiated by country/region |            | x         |              | Homogenous by default but can be differentiated.                                                                                                                                                                                                                                                                                                                                      |



|                      |                                                       |   |   |  |                                                                                                                                                                                                                                                    |
|----------------------|-------------------------------------------------------|---|---|--|----------------------------------------------------------------------------------------------------------------------------------------------------------------------------------------------------------------------------------------------------|
|                      | Regional risk factors included                        |   | x |  | Homogenous by default but can be differentiated.                                                                                                                                                                                                   |
|                      | Technology costs differentiated by country/region     |   | x |  | Homogenous by default but can be differentiated.                                                                                                                                                                                                   |
|                      | Technological change differentiated by country/region |   | x |  | Homogenous by default but can be differentiated.                                                                                                                                                                                                   |
|                      | Behavioral change differentiated by country/region    |   | x |  | Varies by sector. By default, technology preferences evolve homogenously across regions for some sectors/technologies and are differentiated for others (e.g., nuclear power). Technology preferences and behavioral change can be differentiated. |
| Resource use         | Coal                                                  | x |   |  |                                                                                                                                                                                                                                                    |
|                      | Conventional oil                                      | x |   |  |                                                                                                                                                                                                                                                    |
|                      | Unconventional oil                                    | x |   |  |                                                                                                                                                                                                                                                    |
|                      | Conventional gas                                      | x |   |  |                                                                                                                                                                                                                                                    |
|                      | Unconventional gas                                    | x |   |  |                                                                                                                                                                                                                                                    |
|                      | Uranium                                               | x |   |  |                                                                                                                                                                                                                                                    |
|                      | Bioenergy                                             | x |   |  |                                                                                                                                                                                                                                                    |
|                      | Water                                                 | x |   |  |                                                                                                                                                                                                                                                    |
|                      | Raw materials                                         | x |   |  | Limestone for cement production                                                                                                                                                                                                                    |
|                      | Land                                                  | x |   |  |                                                                                                                                                                                                                                                    |
| Technological change | Energy conversion technologies                        |   | x |  |                                                                                                                                                                                                                                                    |
|                      | Energy End-use                                        |   | x |  |                                                                                                                                                                                                                                                    |
|                      | Material Use                                          |   | x |  |                                                                                                                                                                                                                                                    |
|                      | Agriculture                                           |   | x |  |                                                                                                                                                                                                                                                    |

140 **Table SM1C: Energy Supply and Transformation**

| Dimension                      | Sub-Dimension                      | Endogenous | Exogenous | Not Included | Details                                                                                                         |
|--------------------------------|------------------------------------|------------|-----------|--------------|-----------------------------------------------------------------------------------------------------------------|
| Energy technology substitution | Energy technology choice           |            |           |              | Logit choice model                                                                                              |
|                                | Energy technology substitutability |            |           |              | Mixed high and low substitutability                                                                             |
| Electricity technologies       | Coal w/o CCS                       | x          |           |              | conventional and integrated gasification combined cycle (IGCC)                                                  |
|                                | Coal w/ CCS                        | x          |           |              | conventional and IGCC                                                                                           |
|                                | Gas w/o CCS                        | x          |           |              | combined cycle (CC), steam turbine (ST), and combustion turbine (CT)                                            |
|                                | Gas w/ CCS                         | x          |           |              | CC                                                                                                              |
|                                | Oil w/o CCS                        | x          |           |              | combined cycle (CC) and steam/CT                                                                                |
|                                | Oil w/ CCS                         | x          |           |              | CC                                                                                                              |
|                                | Bioenergy w/o CCS                  | x          |           |              | conventional and IGCC                                                                                           |
|                                | Bioenergy w/ CCS                   | x          |           |              | conventional and IGCC                                                                                           |
|                                | Geothermal power                   |            | x         |              | geothermal is not available in all states; deployment is endogenous in regions outside the USA                  |
|                                | Nuclear power                      | x          |           |              | generation II (historic) and III (next gen)                                                                     |
|                                | Solar power                        | x          |           |              | central PV, distributed PV, CSP                                                                                 |
|                                | Wind power                         | x          |           |              | onshore, offshore (only states with coastline on Atlantic Ocean, Pacific Ocean, Gulf of Mexico, or Great Lakes) |
|                                | Hydroelectric power                |            | x         |              |                                                                                                                 |
|                                | Ocean power                        |            |           | x            |                                                                                                                 |
| Hydrogen production            | Coal to hydrogen w/o CCS           | x          |           |              |                                                                                                                 |
|                                | Coal to hydrogen w/ CCS            | x          |           |              |                                                                                                                 |
|                                | Natural gas to hydrogen w/o CCS    | x          |           |              |                                                                                                                 |

|                 |                                 |   |  |   |                                                                                             |
|-----------------|---------------------------------|---|--|---|---------------------------------------------------------------------------------------------|
|                 | Natural gas to hydrogen w/ CCS  | x |  |   |                                                                                             |
|                 | Oil to hydrogen w/o CCS         |   |  | x |                                                                                             |
|                 | Oil to hydrogen w/ CCS          |   |  | x |                                                                                             |
|                 | Biomass to hydrogen w/o CCS     | x |  |   |                                                                                             |
|                 | Biomass to hydrogen w/ CCS      | x |  |   |                                                                                             |
|                 | Nuclear thermochemical hydrogen | x |  |   |                                                                                             |
|                 | Solar thermochemical hydrogen   |   |  | x |                                                                                             |
|                 | Electrolysis                    |   |  | x | included in global regions (but not GCAM-USA state-level regions)                           |
| Refined liquids | Coal to liquids w/o CCS         | x |  |   |                                                                                             |
|                 | Coal to liquids w/ CCS          | x |  |   |                                                                                             |
|                 | Gas to liquids w/o CCS          | x |  |   |                                                                                             |
|                 | Gas to liquids w/ CCS           |   |  | x |                                                                                             |
|                 | Bioliqids w/o CCS               | x |  |   |                                                                                             |
|                 | Bioliqids w/ CCS                | x |  |   |                                                                                             |
|                 | Oil refining                    | x |  |   |                                                                                             |
| Refined gasses  | Coal to gas w/o CCS             | x |  |   |                                                                                             |
|                 | Coal to gas w/ CCS              |   |  | x |                                                                                             |
|                 | Oil to gas w/o CCS              | x |  |   |                                                                                             |
|                 | Oil to gas w/ CCS               |   |  | x |                                                                                             |
|                 | Biomass to gas w/o CCS          | x |  |   |                                                                                             |
|                 | Biomass to gas w/ CCS           |   |  | x |                                                                                             |
| Heat generation | Coal heat                       |   |  | x | district heat is represented for some global regions (but not GCAM-USA state-level regions) |
|                 | Natural gas heat                |   |  | x |                                                                                             |
|                 | Oil heat                        |   |  | x |                                                                                             |

|                      |                              |   |   |   |                                                                                                                                                                                                                                                                                                    |
|----------------------|------------------------------|---|---|---|----------------------------------------------------------------------------------------------------------------------------------------------------------------------------------------------------------------------------------------------------------------------------------------------------|
|                      | Biomass heat                 |   |   | x |                                                                                                                                                                                                                                                                                                    |
|                      | Geothermal heat              |   |   | x |                                                                                                                                                                                                                                                                                                    |
|                      | Solar thermal heat           |   |   | x |                                                                                                                                                                                                                                                                                                    |
|                      | CHP (coupled heat and power) | x |   |   | represented in state-level industry sectors                                                                                                                                                                                                                                                        |
| Grid Infra Structure | Electricity                  |   | x |   | Electricity is freely traded between U.S. state-level regions in the same grid region (GCAM-USA contains 15 grid regions) and traded on a more limited basis between grid regions. For more information on electricity trade in GCAM-USA, see Supplementary Note 1: Electricity trade in GCAM-USA. |
|                      | Gas                          |   |   | x |                                                                                                                                                                                                                                                                                                    |
|                      | Heat                         |   |   | x |                                                                                                                                                                                                                                                                                                    |
|                      | CO2                          |   | x |   | Geologic carbon storage potentials and costs are represented at the grid-region level.                                                                                                                                                                                                             |
|                      | Hydrogen                     |   |   | x |                                                                                                                                                                                                                                                                                                    |

**Table SM1D: Energy end-use**

| Dimension                | Sub-Dimension              | Endogenous | Exogenous | Not Included | Details                                                                                                  |
|--------------------------|----------------------------|------------|-----------|--------------|----------------------------------------------------------------------------------------------------------|
| Passenger transportation | Passenger trains           | x          |           |              | liquid fuels (standard and advanced), electric (standard and advanced), high speed rail (electric)       |
|                          | Buses                      | x          |           |              |                                                                                                          |
|                          | CNG Buses                  | x          |           |              |                                                                                                          |
|                          | Electric Buses             |            |           | x            |                                                                                                          |
|                          | Light Duty Vehicles (LDVs) | x          |           |              | 2 size classes (Car, Large Car and Truck)                                                                |
|                          | Gasoline LDVs              | x          |           |              | no distinction between gasoline and diesel internal combustion engine (ICE) vehicles                     |
|                          | Diesel LDVs                |            |           | x            |                                                                                                          |
|                          | Hybrid LDVs                | x          |           |              |                                                                                                          |
|                          | Electric LDVs              | x          |           |              |                                                                                                          |
|                          | Hydrogen LDVs              | x          |           |              |                                                                                                          |
|                          | Passenger aircrafts        | x          |           |              |                                                                                                          |
|                          | Diesel Three-wheelers      | x          |           |              |                                                                                                          |
|                          | CNG Three-wheelers         |            |           | x            |                                                                                                          |
|                          | Electric Three-wheelers    | x          |           |              |                                                                                                          |
|                          | LPG/CNG LDVs               | x          |           |              |                                                                                                          |
| Freight transportation   | Freight trains             | x          |           |              | coal, liquid fuels (standard and advanced), electric (standard and advanced)                             |
|                          | Heavy duty vehicles        | x          |           |              | 3 size classes (light truck, medium truck, heavy truck); liquid fuels and LPG/CNG for each               |
|                          | Freight aircrafts          |            |           | x            |                                                                                                          |
|                          | Freight ships              | x          |           |              |                                                                                                          |
| Industry                 | Steel production           |            |           | x            |                                                                                                          |
|                          | Aluminum production        |            |           | x            |                                                                                                          |
|                          | Cement production          | x          |           |              |                                                                                                          |
|                          | Petrochemical production   |            |           | x            | not explicitly represented, but feedstock use of energy carriers in the industrial sector is represented |
|                          | Plastics production        |            |           | x            |                                                                                                          |

|                       |                  |   |  |   |                                                                                                                                        |
|-----------------------|------------------|---|--|---|----------------------------------------------------------------------------------------------------------------------------------------|
|                       | Paper production |   |  | x |                                                                                                                                        |
|                       | Pulp production  |   |  | x |                                                                                                                                        |
| Residential buildings | Space heating    |   |  |   | Electric (furnace, heat pump), gas (furnace, high-efficiency), liquid fuel (furnace, high-efficiency), biomass (wood furnace)          |
|                       | Space cooling    | x |  |   | Electric (standard, high-efficiency)                                                                                                   |
|                       | Water heating    | x |  |   | Gas (standard, high-efficiency), electric (resistance, resistance high-efficiency, heat pump), liquid fuel (standard, high-efficiency) |
|                       | Lighting         | x |  |   | Electric (incandescent, fluorescent, solid state)                                                                                      |
|                       | Refrigerators    |   |  |   | Electric (standard, high-efficiency)                                                                                                   |
|                       | Freezers         | x |  |   | Electric (standard, high-efficiency)                                                                                                   |
|                       | Dishwashers      | x |  |   | Electric (standard, high-efficiency)                                                                                                   |
|                       | Cooking          |   |  |   | Electric, gas (standard, high-efficiency), LPG (standard, high-efficiency)                                                             |
|                       | Clothes washers  | x |  |   | Electric (standard, high-efficiency)                                                                                                   |
|                       | Clothes dryers   | x |  |   | Electric (standard, high-efficiency), gas                                                                                              |
|                       | Televisions      | x |  |   | Electric                                                                                                                               |
|                       | Computers        | x |  |   | Electric                                                                                                                               |
|                       | Furnace fans     | x |  |   | Electric                                                                                                                               |
|                       | Other            | x |  |   | Electric, gas, liquid fuels                                                                                                            |
| Commercial buildings  | Space heating    | x |  |   | Electric (furnace, heat pump), gas (furnace, high-efficiency), liquid fuel (fuel furnace), biomass (wood furnace)                      |
|                       | Space cooling    |   |  |   | Electric (standard, high-efficiency), gas                                                                                              |
|                       | Water heating    | x |  |   | Gas (standard, high-efficiency), electric (resistance, heat pump), liquid fuel                                                         |
|                       | Ventilation      | x |  |   | Electric (standard, high-efficiency)                                                                                                   |
|                       | Cooking          |   |  |   | Electric (standard, high-efficiency), gas (standard, high-efficiency)                                                                  |
|                       | Lighting         | x |  |   | Electric (incandescent, fluorescent, solid state)                                                                                      |
|                       | Refrigeration    | x |  |   | Electric (standard, high-efficiency)                                                                                                   |
|                       | Office           | x |  |   | Electric                                                                                                                               |
|                       | Other            | x |  |   | Electric, gas, liquid fuels                                                                                                            |

**Table SM1E: Land use**

| Dimension                        | Sub-Dimension                  | Endogenous | Exogenous | Not Included | Details |
|----------------------------------|--------------------------------|------------|-----------|--------------|---------|
| Land cover                       | Cropland                       | x          |           |              |         |
|                                  | Cropland irrigated             | x          |           |              |         |
|                                  | Cropland food crops            | x          |           |              |         |
|                                  | Cropland feed crops            | x          |           |              |         |
|                                  | Cropland energy crops          | x          |           |              |         |
|                                  | Forest                         | x          |           |              |         |
|                                  | Managed forest                 | x          |           |              |         |
|                                  | Natural forest                 | x          |           |              |         |
|                                  | Pasture                        | x          |           |              |         |
|                                  | Shrubland                      | x          |           |              |         |
|                                  | Built-up area                  | x          |           |              |         |
| Agriculture and forestry demands | Agriculture food               | x          |           |              |         |
|                                  | Agriculture food crops         | x          |           |              |         |
|                                  | Agriculture food livestock     | x          |           |              |         |
|                                  | Agriculture feed               | x          |           |              |         |
|                                  | Agriculture feed crops         | x          |           |              |         |
|                                  | Agriculture feed livestock     | x          |           |              |         |
|                                  | Agriculture non-food           | x          |           |              |         |
|                                  | Agriculture non-food crops     | x          |           |              |         |
|                                  | Agriculture non-food livestock | x          |           |              |         |
|                                  | Agriculture bioenergy          | x          |           |              |         |
|                                  | Agriculture residues           | x          |           |              |         |
|                                  | Forest industrial roundwood    | x          |           |              |         |
|                                  | Forest fuelwood                | x          |           |              |         |

|                          |                            |   |  |  |  |
|--------------------------|----------------------------|---|--|--|--|
|                          | Forest residues            | x |  |  |  |
| Agricultural commodities | Wheat                      | x |  |  |  |
|                          | Rice                       | x |  |  |  |
|                          | Other coarse grains        | x |  |  |  |
|                          | Oilseeds                   | x |  |  |  |
|                          | Sugar crops                | x |  |  |  |
|                          | Ruminant meat              | x |  |  |  |
|                          | Non-ruminant meat and eggs | x |  |  |  |
|                          | Dairy products             | x |  |  |  |



**Table SM1F: Emissions, climate, and impacts**

| Dimension        | Sub-Dimension    | Endogenous | Exogenous | Not Included | Details                                                 |
|------------------|------------------|------------|-----------|--------------|---------------------------------------------------------|
| Greenhouse gases | CO2 fossil fuels | x          |           |              |                                                         |
|                  | CO2 cement       | x          |           |              |                                                         |
|                  | CO2 land use     | x          |           |              |                                                         |
|                  | CH4 energy       |            |           | x            | Included in GCAM but not currently included in GCAM-USA |
|                  | CH4 land use     |            |           | x            | Included in GCAM but not currently included in GCAM-USA |
|                  | CH4 other        |            |           | x            | Included in GCAM but not currently included in GCAM-USA |
|                  | N2O energy       |            |           | x            | Included in GCAM but not currently included in GCAM-USA |
|                  | N2O land use     |            |           | x            | Included in GCAM but not currently included in GCAM-USA |
|                  | N2O other        |            |           | x            | Included in GCAM but not currently included in GCAM-USA |
|                  | CFCs             |            |           | x            | Included in GCAM but not currently included in GCAM-USA |
|                  | HFCs             |            |           | x            | Included in GCAM but not currently included in GCAM-USA |
|                  | SF6              |            |           | x            | Included in GCAM but not currently included in GCAM-USA |
|                  | PFCs             |            |           | x            | Included in GCAM but not currently included in GCAM-USA |
| Pollutants       | CO energy        |            |           | x            | Included in GCAM but not currently included in GCAM-USA |
|                  | CO land use      |            |           | x            | Included in GCAM but not currently included in GCAM-USA |
|                  | CO other         |            |           | x            | Included in GCAM but not currently included in GCAM-USA |
|                  | NOx energy       |            |           | x            | Included in GCAM but not currently included in GCAM-USA |
|                  | NOx land use     |            |           | x            | Included in GCAM but not currently included in GCAM-USA |
|                  | NOx other        |            |           | x            | Included in GCAM but not currently included in GCAM-USA |
|                  | VOC energy       |            |           | x            | Included in GCAM but not currently included in GCAM-USA |
|                  | VOC land use     |            |           | x            | Included in GCAM but not currently included in GCAM-USA |
|                  | VOC other        |            |           | x            | Included in GCAM but not currently included in GCAM-USA |
|                  | SO2 energy       |            |           | x            | Included in GCAM but not currently included in GCAM-USA |
|                  | SO2 land use     |            |           | x            | Included in GCAM but not currently included in GCAM-USA |
|                  | SO2 other        |            |           | x            | Included in GCAM but not currently included in GCAM-USA |
|                  | BC energy        |            |           | x            | Included in GCAM but not currently included in GCAM-USA |
|                  | BC land use      |            |           | x            | Included in GCAM but not currently included in GCAM-USA |
|                  | BC other         |            |           | x            | Included in GCAM but not currently included in GCAM-USA |
|                  | OC energy        |            |           | x            | Included in GCAM but not currently included in GCAM-USA |

|                        |                                |   |   |   |                                                         |
|------------------------|--------------------------------|---|---|---|---------------------------------------------------------|
|                        | OC land use                    |   |   | x | Included in GCAM but not currently included in GCAM-USA |
|                        | OC other                       |   |   | x | Included in GCAM but not currently included in GCAM-USA |
|                        | NH3 energy                     |   |   | x | Included in GCAM but not currently included in GCAM-USA |
|                        | NH3 land use                   |   |   | x | Included in GCAM but not currently included in GCAM-USA |
|                        | NH3 other                      |   |   | x | Included in GCAM but not currently included in GCAM-USA |
| Climate indicators     | Concentration: CO2             |   |   | x | Included in GCAM but not currently included in GCAM-USA |
|                        | Concentration: CH4             |   |   | x | Included in GCAM but not currently included in GCAM-USA |
|                        | Concentration: N2O             |   |   | x | Included in GCAM but not currently included in GCAM-USA |
|                        | Concentration: Kyoto gases     |   |   | x | Included in GCAM but not currently included in GCAM-USA |
|                        | Radiative forcing: CO2         |   |   | x | Included in GCAM but not currently included in GCAM-USA |
|                        | Radiative forcing: CH4         |   |   | x | Included in GCAM but not currently included in GCAM-USA |
|                        | Radiative forcing: N2O         |   |   | x | Included in GCAM but not currently included in GCAM-USA |
|                        | Radiative forcing: F-gases     |   |   | x | Included in GCAM but not currently included in GCAM-USA |
|                        | Radiative forcing: Kyoto gases |   |   | x | Included in GCAM but not currently included in GCAM-USA |
|                        | Radiative forcing: aerosols    |   |   | x | Included in GCAM but not currently included in GCAM-USA |
|                        | Radiative forcing: land albedo |   |   | x | Included in GCAM but not currently included in GCAM-USA |
|                        | Radiative forcing: AN3A        |   |   | x | Included in GCAM but not currently included in GCAM-USA |
|                        | Radiative forcing: total       |   |   | x | Included in GCAM but not currently included in GCAM-USA |
|                        | Temperature change             |   |   | x | Included in GCAM but not currently included in GCAM-USA |
| Carbon dioxide removal | Bioenergy with CCS             | x |   |   |                                                         |
|                        | Reforestation                  | x |   |   |                                                         |
|                        | Afforestation                  | x |   |   |                                                         |
|                        | Soil carbon enhancement        |   |   | x |                                                         |
|                        | Direct air capture             |   |   | x |                                                         |
|                        | Enhanced weathering            |   |   | x |                                                         |
| Climate change impacts | Agriculture                    |   | x |   | Not included by default but possible to implement       |
|                        | Energy supply                  |   |   | x |                                                         |

|             |                                                         |   |  |   |                                                         |
|-------------|---------------------------------------------------------|---|--|---|---------------------------------------------------------|
|             | Energy demand                                           | x |  |   | Not included by default but possible to implement       |
|             | Economic output                                         |   |  | x |                                                         |
|             | Built capital                                           |   |  | x |                                                         |
| Co-Linkages | Energy security: Fossil fuel imports & exports (region) | x |  |   |                                                         |
|             | Energy access: Household energy consumption             | x |  |   |                                                         |
|             | Air pollution & health: Source-based aerosol emissions  |   |  | x | Included in GCAM but not currently included in GCAM-USA |
|             | Air pollution & health: Health impacts of air Pollution |   |  | x |                                                         |
|             | Food access                                             | x |  |   |                                                         |
|             | Water availability                                      | x |  |   |                                                         |
|             | Biodiversity                                            |   |  | x |                                                         |

150

**Table SM2: GCAM-USA Reference scenario Socioeconomic Assumptions**

155

**GCAM-USA Reference scenario Population (million persons)**

| Region | 2015  | 2020  | 2025  | 2030  | 2035  | 2040  | 2045  | 2050  | 2055  | 2060  | 2065  | 2070  | 2075  | 2080  | 2085  | 2090  | 2095  | 2100  |
|--------|-------|-------|-------|-------|-------|-------|-------|-------|-------|-------|-------|-------|-------|-------|-------|-------|-------|-------|
| AK     | 0.74  | 0.73  | 0.73  | 0.75  | 0.76  | 0.78  | 0.8   | 0.81  | 0.83  | 0.84  | 0.85  | 0.85  | 0.86  | 0.87  | 0.88  | 0.88  | 0.88  | 0.88  |
| AL     | 4.85  | 4.92  | 5.02  | 5.15  | 5.28  | 5.4   | 5.5   | 5.6   | 5.7   | 5.79  | 5.88  | 5.96  | 6.01  | 6.07  | 6.08  | 6.1   | 6.09  | 6.08  |
| AR     | 2.98  | 3.04  | 3.1   | 3.18  | 3.25  | 3.32  | 3.37  | 3.43  | 3.48  | 3.53  | 3.57  | 3.62  | 3.64  | 3.67  | 3.67  | 3.68  | 3.67  | 3.66  |
| AZ     | 6.83  | 7.41  | 7.91  | 8.29  | 8.56  | 8.84  | 9.09  | 9.33  | 9.57  | 9.8   | 10.02 | 10.23 | 10.39 | 10.54 | 10.64 | 10.73 | 10.77 | 10.81 |
| CA     | 38.95 | 39.91 | 41.06 | 42.58 | 44.11 | 45.64 | 47    | 48.36 | 49.68 | 51    | 52.2  | 53.41 | 54.31 | 55.21 | 55.78 | 56.36 | 56.64 | 56.93 |
| CO     | 5.45  | 5.85  | 6.19  | 6.46  | 6.66  | 6.87  | 7.05  | 7.23  | 7.41  | 7.58  | 7.74  | 7.9   | 8.02  | 8.13  | 8.2   | 8.27  | 8.3   | 8.33  |
| CT     | 3.59  | 3.58  | 3.63  | 3.75  | 3.87  | 4     | 4.11  | 4.22  | 4.32  | 4.43  | 4.53  | 4.62  | 4.7   | 4.77  | 4.81  | 4.85  | 4.87  | 4.89  |
| DC     | 0.68  | 0.71  | 0.74  | 0.78  | 0.81  | 0.84  | 0.86  | 0.89  | 0.92  | 0.94  | 0.97  | 0.99  | 1.01  | 1.03  | 1.04  | 1.05  | 1.06  | 1.07  |
| DE     | 0.94  | 0.99  | 1.03  | 1.07  | 1.11  | 1.14  | 1.17  | 1.2   | 1.23  | 1.26  | 1.29  | 1.31  | 1.33  | 1.35  | 1.36  | 1.37  | 1.38  | 1.38  |
| FL     | 20.22 | 21.91 | 23.27 | 24.31 | 25.12 | 25.93 | 26.63 | 27.34 | 28.04 | 28.73 | 29.35 | 29.98 | 30.44 | 30.9  | 31.19 | 31.47 | 31.6  | 31.73 |
| GA     | 10.18 | 10.72 | 11.2  | 11.61 | 11.94 | 12.27 | 12.55 | 12.83 | 13.1  | 13.37 | 13.61 | 13.85 | 14.02 | 14.18 | 14.26 | 14.34 | 14.36 | 14.38 |
| HI     | 1.42  | 1.42  | 1.42  | 1.46  | 1.5   | 1.55  | 1.58  | 1.62  | 1.66  | 1.69  | 1.73  | 1.76  | 1.78  | 1.8   | 1.82  | 1.83  | 1.84  | 1.84  |
| IA     | 3.12  | 3.18  | 3.26  | 3.35  | 3.43  | 3.51  | 3.58  | 3.64  | 3.7   | 3.77  | 3.82  | 3.88  | 3.91  | 3.95  | 3.96  | 3.97  | 3.97  | 3.96  |
| ID     | 1.65  | 1.82  | 1.96  | 2.04  | 2.1   | 2.15  | 2.19  | 2.24  | 2.28  | 2.33  | 2.37  | 2.4   | 2.43  | 2.45  | 2.47  | 2.48  | 2.48  | 2.48  |
| IL     | 12.86 | 12.69 | 12.75 | 13.12 | 13.55 | 13.98 | 14.37 | 14.74 | 15.12 | 15.49 | 15.82 | 16.15 | 16.4  | 16.64 | 16.79 | 16.94 | 17.01 | 17.07 |
| IN     | 6.61  | 6.76  | 6.95  | 7.18  | 7.39  | 7.59  | 7.77  | 7.94  | 8.12  | 8.29  | 8.44  | 8.59  | 8.7   | 8.8   | 8.85  | 8.91  | 8.92  | 8.93  |
| KS     | 2.91  | 2.92  | 2.96  | 3.04  | 3.13  | 3.21  | 3.28  | 3.35  | 3.42  | 3.49  | 3.55  | 3.61  | 3.65  | 3.69  | 3.71  | 3.73  | 3.74  | 3.74  |
| KY     | 4.43  | 4.5   | 4.59  | 4.72  | 4.83  | 4.94  | 5.03  | 5.11  | 5.2   | 5.29  | 5.36  | 5.43  | 5.48  | 5.52  | 5.54  | 5.55  | 5.54  | 5.53  |
| LA     | 4.66  | 4.65  | 4.68  | 4.8   | 4.93  | 5.06  | 5.17  | 5.28  | 5.38  | 5.49  | 5.58  | 5.68  | 5.74  | 5.81  | 5.84  | 5.87  | 5.88  | 5.88  |
| MA     | 6.8   | 6.98  | 7.22  | 7.49  | 7.75  | 8.02  | 8.25  | 8.48  | 8.71  | 8.94  | 9.15  | 9.35  | 9.51  | 9.66  | 9.76  | 9.85  | 9.9   | 9.95  |
| MD     | 5.99  | 6.09  | 6.24  | 6.46  | 6.68  | 6.9   | 7.1   | 7.29  | 7.48  | 7.67  | 7.84  | 8.02  | 8.14  | 8.27  | 8.35  | 8.42  | 8.46  | 8.5   |
| ME     | 1.33  | 1.34  | 1.37  | 1.4   | 1.43  | 1.45  | 1.47  | 1.49  | 1.51  | 1.53  | 1.54  | 1.56  | 1.57  | 1.58  | 1.58  | 1.57  | 1.57  | 1.56  |
| MI     | 9.93  | 10.05 | 10.25 | 10.56 | 10.88 | 11.19 | 11.45 | 11.72 | 11.97 | 12.23 | 12.46 | 12.69 | 12.86 | 13.02 | 13.1  | 13.19 | 13.21 | 13.23 |
| MN     | 5.48  | 5.7   | 5.9   | 6.1   | 6.27  | 6.44  | 6.58  | 6.72  | 6.86  | 6.99  | 7.11  | 7.24  | 7.32  | 7.4   | 7.44  | 7.49  | 7.49  | 7.5   |
| MO     | 6.07  | 6.17  | 6.3   | 6.49  | 6.68  | 6.86  | 7.02  | 7.17  | 7.32  | 7.47  | 7.61  | 7.74  | 7.83  | 7.92  | 7.97  | 8.01  | 8.02  | 8.03  |
| MS     | 2.99  | 2.99  | 3.01  | 3.07  | 3.14  | 3.2   | 3.25  | 3.29  | 3.34  | 3.39  | 3.43  | 3.47  | 3.49  | 3.51  | 3.51  | 3.51  | 3.5   | 3.49  |
| MT     | 1.03  | 1.08  | 1.12  | 1.15  | 1.17  | 1.2   | 1.21  | 1.23  | 1.25  | 1.26  | 1.28  | 1.29  | 1.3   | 1.3   | 1.3   | 1.31  | 1.3   | 1.3   |
| NC     | 10.03 | 10.6  | 11.09 | 11.48 | 11.78 | 12.08 | 12.32 | 12.57 | 12.81 | 13.05 | 13.26 | 13.47 | 13.61 | 13.74 | 13.8  | 13.86 | 13.86 | 13.85 |
| ND     | 0.75  | 0.77  | 0.79  | 0.82  | 0.83  | 0.85  | 0.87  | 0.88  | 0.89  | 0.91  | 0.92  | 0.93  | 0.94  | 0.94  | 0.95  | 0.95  | 0.95  | 0.94  |
| NE     | 1.89  | 1.95  | 2.01  | 2.08  | 2.14  | 2.19  | 2.24  | 2.29  | 2.34  | 2.38  | 2.42  | 2.46  | 2.49  | 2.52  | 2.53  | 2.55  | 2.55  | 2.55  |
| NH     | 1.34  | 1.37  | 1.4   | 1.44  | 1.48  | 1.51  | 1.54  | 1.56  | 1.59  | 1.62  | 1.64  | 1.66  | 1.68  | 1.69  | 1.69  | 1.7   | 1.7   | 1.69  |
| NJ     | 8.87  | 8.96  | 9.17  | 9.48  | 9.81  | 10.14 | 10.44 | 10.73 | 11.01 | 11.3  | 11.55 | 11.81 | 12.01 | 12.2  | 12.32 | 12.44 | 12.5  | 12.56 |
| NM     | 2.09  | 2.1   | 2.14  | 2.2   | 2.26  | 2.32  | 2.37  | 2.42  | 2.46  | 2.51  | 2.56  | 2.6   | 2.63  | 2.66  | 2.67  | 2.69  | 2.69  | 2.69  |
| NV     | 2.87  | 3.15  | 3.4   | 3.57  | 3.69  | 3.81  | 3.92  | 4.02  | 4.13  | 4.23  | 4.32  | 4.42  | 4.48  | 4.55  | 4.6   | 4.64  | 4.66  | 4.67  |
| NY     | 19.66 | 19.49 | 19.66 | 20.23 | 20.91 | 21.58 | 22.17 | 22.76 | 23.33 | 23.91 | 24.42 | 24.94 | 25.32 | 25.71 | 25.94 | 26.17 | 26.27 | 26.38 |
| OH     | 11.62 | 11.75 | 12    | 12.38 | 12.77 | 13.15 | 13.48 | 13.81 | 14.13 | 14.46 | 14.74 | 15.03 | 15.24 | 15.44 | 15.56 | 15.68 | 15.71 | 15.76 |
| OK     | 3.91  | 3.97  | 4.05  | 4.16  | 4.27  | 4.38  | 4.47  | 4.56  | 4.64  | 4.73  | 4.81  | 4.88  | 4.93  | 4.98  | 5.01  | 5.03  | 5.03  | 5.03  |
| OR     | 4.02  | 4.28  | 4.48  | 4.65  | 4.79  | 4.93  | 5.05  | 5.17  | 5.29  | 5.4   | 5.51  | 5.62  | 5.69  | 5.76  | 5.8   | 5.85  | 5.86  | 5.87  |
| PA     | 12.79 | 12.86 | 13.1  | 13.49 | 13.9  | 14.3  | 14.65 | 14.99 | 15.33 | 15.67 | 15.97 | 16.27 | 16.48 | 16.69 | 16.8  | 16.92 | 16.95 | 16.99 |
| RI     | 1.06  | 1.06  | 1.08  | 1.12  | 1.16  | 1.2   | 1.23  | 1.26  | 1.3   | 1.33  | 1.36  | 1.39  | 1.41  | 1.43  | 1.45  | 1.46  | 1.47  | 1.48  |
| SC     | 4.89  | 5.2   | 5.47  | 5.67  | 5.82  | 5.97  | 6.1   | 6.22  | 6.34  | 6.46  | 6.57  | 6.68  | 6.75  | 6.82  | 6.85  | 6.88  | 6.88  | 6.89  |
| SD     | 0.85  | 0.9   | 0.94  | 0.96  | 0.98  | 1     | 1.02  | 1.03  | 1.05  | 1.06  | 1.07  | 1.08  | 1.09  | 1.09  | 1.1   | 1.1   | 1.09  | 1.09  |
| TN     | 6.59  | 6.89  | 7.17  | 7.42  | 7.61  | 7.81  | 7.98  | 8.14  | 8.3   | 8.46  | 8.61  | 8.75  | 8.85  | 8.94  | 8.98  | 9.03  | 9.03  | 9.04  |
| TX     | 27.49 | 29.43 | 31.07 | 32.4  | 33.45 | 34.51 | 35.43 | 36.34 | 37.23 | 38.12 | 38.92 | 39.72 | 40.3  | 40.88 | 41.22 | 41.55 | 41.69 | 41.82 |
| UT     | 2.98  | 3.27  | 3.5   | 3.67  | 3.78  | 3.9   | 4     | 4.1   | 4.2   | 4.29  | 4.38  | 4.47  | 4.54  | 4.6   | 4.64  | 4.68  | 4.69  | 4.71  |
| VA     | 8.36  | 8.63  | 8.91  | 9.21  | 9.48  | 9.76  | 9.99  | 10.22 | 10.44 | 10.67 | 10.87 | 11.07 | 11.21 | 11.35 | 11.42 | 11.49 | 11.51 | 11.53 |
| VT     | 0.62  | 0.63  | 0.64  | 0.65  | 0.66  | 0.67  | 0.67  | 0.68  | 0.68  | 0.69  | 0.69  | 0.7   | 0.7   | 0.7   | 0.7   | 0.7   | 0.69  | 0.68  |
| WA     | 7.16  | 7.75  | 8.21  | 8.57  | 8.84  | 9.11  | 9.35  | 9.58  | 9.81  | 10.04 | 10.25 | 10.46 | 10.61 | 10.76 | 10.85 | 10.94 | 10.97 | 11.01 |
| WI     | 5.76  | 5.86  | 6     | 6.17  | 6.33  | 6.49  | 6.62  | 6.74  | 6.87  | 7     | 7.11  | 7.22  | 7.29  | 7.37  | 7.4   | 7.43  | 7.43  | 7.43  |
| WV     | 1.84  | 1.79  | 1.78  | 1.8   | 1.84  | 1.87  | 1.89  | 1.92  | 1.94  | 1.97  | 1.99  | 2.01  | 2.02  | 2.02  | 2.02  | 2.02  | 2.01  | 2     |
| WY     | 0.59  | 0.58  | 0.58  | 0.6   | 0.61  | 0.62  | 0.64  | 0.65  | 0.66  | 0.67  | 0.68  | 0.69  | 0.7   | 0.7   | 0.71  | 0.71  | 0.71  | 0.71  |

GCAM-USA Reference scenario GDP (billion 2015 USD)

| Region | 2015 | 2020 | 2025 | 2030 | 2035 | 2040 | 2045 | 2050 | 2055 | 2060 | 2065 | 2070 | 2075 | 2080 | 2085 | 2090  | 2095  | 2100  |
|--------|------|------|------|------|------|------|------|------|------|------|------|------|------|------|------|-------|-------|-------|
| AK     | 56   | 55   | 56   | 61   | 66   | 72   | 79   | 87   | 94   | 102  | 109  | 116  | 124  | 131  | 137  | 143   | 148   | 153   |
| AL     | 197  | 214  | 239  | 269  | 295  | 326  | 359  | 396  | 428  | 461  | 494  | 526  | 557  | 586  | 612  | 637   | 658   | 677   |
| AR     | 118  | 124  | 133  | 147  | 162  | 177  | 195  | 213  | 232  | 251  | 270  | 289  | 306  | 323  | 337  | 351   | 363   | 373   |
| AZ     | 292  | 348  | 412  | 474  | 531  | 593  | 660  | 733  | 813  | 897  | 980  | 1066 | 1146 | 1225 | 1295 | 1361  | 1416  | 1466  |
| CA     | 2536 | 2989 | 3455 | 3886 | 4299 | 4753 | 5260 | 5804 | 6374 | 6967 | 7561 | 8169 | 8737 | 9304 | 9806 | 10292 | 10704 | 11086 |
| CO     | 322  | 376  | 438  | 501  | 560  | 624  | 694  | 770  | 854  | 940  | 1027 | 1116 | 1199 | 1281 | 1353 | 1422  | 1479  | 1530  |
| CT     | 253  | 259  | 281  | 316  | 355  | 402  | 454  | 509  | 569  | 631  | 693  | 757  | 817  | 876  | 929  | 978   | 1019  | 1055  |
| DC     | 122  | 135  | 150  | 165  | 181  | 199  | 217  | 237  | 256  | 276  | 296  | 316  | 336  | 355  | 372  | 390   | 404   | 419   |
| DE     | 69   | 67   | 71   | 77   | 84   | 91   | 99   | 107  | 115  | 124  | 132  | 140  | 148  | 156  | 163  | 170   | 176   | 182   |
| FL     | 874  | 1023 | 1176 | 1307 | 1427 | 1557 | 1695 | 1838 | 1978 | 2124 | 2269 | 2418 | 2556 | 2695 | 2819 | 2942  | 3049  | 3153  |
| GA     | 501  | 573  | 640  | 704  | 765  | 831  | 900  | 972  | 1042 | 1115 | 1186 | 1260 | 1327 | 1394 | 1454 | 1512  | 1562  | 1610  |
| HI     | 81   | 86   | 93   | 102  | 112  | 123  | 135  | 148  | 162  | 176  | 191  | 205  | 218  | 232  | 244  | 255   | 265   | 274   |
| IA     | 176  | 184  | 200  | 220  | 241  | 265  | 291  | 319  | 342  | 366  | 390  | 415  | 437  | 459  | 478  | 496   | 512   | 527   |
| ID     | 66   | 79   | 93   | 107  | 119  | 132  | 146  | 161  | 177  | 194  | 212  | 229  | 245  | 261  | 274  | 287   | 298   | 307   |
| IL     | 775  | 834  | 928  | 1034 | 1136 | 1250 | 1376 | 1509 | 1648 | 1793 | 1938 | 2085 | 2222 | 2359 | 2480 | 2597  | 2696  | 2789  |
| IN     | 324  | 354  | 391  | 433  | 474  | 520  | 570  | 622  | 678  | 735  | 791  | 849  | 902  | 955  | 1001 | 1046  | 1083  | 1117  |
| KS     | 152  | 165  | 182  | 202  | 222  | 245  | 270  | 297  | 319  | 343  | 366  | 390  | 412  | 434  | 453  | 471   | 487   | 502   |
| KY     | 189  | 201  | 220  | 246  | 270  | 298  | 329  | 362  | 391  | 421  | 450  | 480  | 507  | 534  | 557  | 580   | 598   | 615   |
| LA     | 242  | 248  | 268  | 298  | 329  | 363  | 400  | 441  | 482  | 524  | 566  | 609  | 648  | 687  | 721  | 754   | 781   | 805   |
| MA     | 491  | 552  | 630  | 720  | 808  | 917  | 1037 | 1165 | 1303 | 1447 | 1593 | 1741 | 1882 | 2021 | 2143 | 2259  | 2355  | 2441  |
| MD     | 360  | 397  | 433  | 475  | 519  | 567  | 617  | 670  | 722  | 776  | 829  | 884  | 935  | 986  | 1032 | 1077  | 1116  | 1154  |
| ME     | 56   | 62   | 68   | 77   | 85   | 95   | 106  | 117  | 129  | 141  | 154  | 166  | 177  | 188  | 198  | 206   | 213   | 219   |
| MI     | 460  | 516  | 583  | 651  | 712  | 781  | 857  | 937  | 1020 | 1107 | 1193 | 1280 | 1361 | 1442 | 1512 | 1580  | 1637  | 1690  |
| MN     | 325  | 362  | 402  | 445  | 490  | 540  | 596  | 655  | 705  | 757  | 808  | 861  | 909  | 957  | 1000 | 1041  | 1076  | 1110  |
| MO     | 288  | 309  | 345  | 383  | 421  | 465  | 513  | 564  | 608  | 653  | 698  | 743  | 785  | 827  | 864  | 900   | 930   | 959   |
| MS     | 104  | 109  | 118  | 131  | 144  | 158  | 174  | 191  | 206  | 221  | 236  | 251  | 264  | 278  | 289  | 300   | 310   | 318   |
| MT     | 47   | 48   | 52   | 57   | 63   | 70   | 77   | 84   | 92   | 100  | 109  | 117  | 125  | 132  | 138  | 145   | 149   | 153   |
| NC     | 489  | 548  | 618  | 680  | 738  | 799  | 864  | 930  | 996  | 1063 | 1129 | 1197 | 1259 | 1320 | 1374 | 1427  | 1473  | 1516  |
| ND     | 57   | 56   | 63   | 69   | 76   | 83   | 91   | 100  | 107  | 115  | 122  | 129  | 136  | 142  | 148  | 154   | 159   | 163   |
| NE     | 115  | 121  | 132  | 145  | 160  | 176  | 194  | 214  | 230  | 247  | 264  | 281  | 297  | 312  | 326  | 340   | 351   | 362   |
| NH     | 74   | 83   | 93   | 104  | 116  | 130  | 146  | 162  | 179  | 197  | 215  | 233  | 250  | 266  | 281  | 294   | 304   | 313   |
| NJ     | 558  | 603  | 669  | 747  | 832  | 926  | 1031 | 1145 | 1266 | 1392 | 1519 | 1648 | 1769 | 1890 | 1997 | 2099  | 2185  | 2264  |
| NM     | 95   | 100  | 111  | 125  | 139  | 155  | 171  | 189  | 209  | 229  | 249  | 270  | 289  | 307  | 324  | 339   | 352   | 363   |
| NV     | 141  | 163  | 188  | 215  | 241  | 269  | 299  | 333  | 369  | 407  | 445  | 484  | 520  | 557  | 589  | 619   | 644   | 667   |
| NY     | 1431 | 1567 | 1745 | 1948 | 2167 | 2407 | 2677 | 2968 | 3278 | 3600 | 3924 | 4253 | 4562 | 4868 | 5138 | 5396  | 5612  | 5808  |
| OH     | 604  | 652  | 718  | 797  | 873  | 959  | 1054 | 1153 | 1258 | 1366 | 1474 | 1583 | 1685 | 1786 | 1875 | 1961  | 2033  | 2101  |
| OK     | 203  | 209  | 232  | 259  | 285  | 314  | 346  | 381  | 416  | 452  | 488  | 524  | 557  | 590  | 618  | 645   | 668   | 688   |
| OR     | 200  | 238  | 274  | 306  | 337  | 371  | 408  | 448  | 490  | 533  | 576  | 620  | 661  | 702  | 737  | 771   | 800   | 826   |
| PA     | 709  | 777  | 864  | 963  | 1068 | 1183 | 1312 | 1450 | 1597 | 1749 | 1902 | 2057 | 2201 | 2343 | 2468 | 2587  | 2685  | 2773  |
| RI     | 55   | 57   | 62   | 69   | 78   | 88   | 99   | 112  | 125  | 138  | 152  | 167  | 180  | 193  | 205  | 216   | 225   | 233   |
| SC     | 198  | 219  | 238  | 260  | 282  | 305  | 330  | 356  | 381  | 407  | 433  | 459  | 482  | 506  | 527  | 548   | 565   | 582   |
| SD     | 47   | 49   | 53   | 58   | 64   | 70   | 77   | 84   | 89   | 95   | 101  | 107  | 112  | 117  | 122  | 127   | 130   | 134   |
| TN     | 314  | 358  | 410  | 467  | 514  | 569  | 629  | 694  | 753  | 812  | 872  | 932  | 987  | 1042 | 1090 | 1137  | 1175  | 1211  |
| TX     | 1662 | 1863 | 2146 | 2434 | 2701 | 2996 | 3321 | 3678 | 4034 | 4405 | 4775 | 5152 | 5502 | 5851 | 6157 | 6452  | 6699  | 6926  |
| UT     | 148  | 178  | 212  | 244  | 273  | 304  | 338  | 375  | 415  | 457  | 499  | 542  | 582  | 622  | 657  | 691   | 718   | 743   |
| VA     | 475  | 525  | 591  | 651  | 708  | 770  | 835  | 902  | 968  | 1036 | 1104 | 1173 | 1237 | 1301 | 1357 | 1412  | 1460  | 1506  |
| VT     | 30   | 32   | 35   | 39   | 43   | 48   | 53   | 58   | 64   | 70   | 76   | 81   | 87   | 92   | 96   | 100   | 103   | 105   |
| WA     | 463  | 587  | 722  | 824  | 908  | 1000 | 1102 | 1212 | 1327 | 1446 | 1565 | 1686 | 1799 | 1911 | 2010 | 2105  | 2186  | 2260  |
| WI     | 298  | 329  | 369  | 410  | 447  | 488  | 534  | 581  | 631  | 682  | 733  | 785  | 832  | 879  | 920  | 960   | 993   | 1023  |
| WV     | 73   | 78   | 86   | 94   | 101  | 109  | 117  | 125  | 133  | 141  | 149  | 157  | 165  | 172  | 178  | 184   | 189   | 194   |
| WY     | 41   | 41   | 43   | 48   | 53   | 59   | 65   | 71   | 79   | 86   | 93   | 101  | 108  | 115  | 121  | 126   | 131   | 135   |

**Table SM3: GCAM-USA High Growth scenario Socioeconomic Assumptions**

GCAM-USA High Growth scenario Population (million persons)

| Region | 2015  | 2020  | 2025  | 2030  | 2035  | 2040  | 2045  | 2050  | 2055  | 2060  | 2065  | 2070  | 2075  | 2080  | 2085  | 2090  | 2095  | 2100  |
|--------|-------|-------|-------|-------|-------|-------|-------|-------|-------|-------|-------|-------|-------|-------|-------|-------|-------|-------|
| AK     | 0.74  | 0.73  | 0.74  | 0.76  | 0.8   | 0.84  | 0.88  | 0.92  | 0.96  | 1.01  | 1.05  | 1.09  | 1.14  | 1.18  | 1.21  | 1.24  | 1.27  | 1.29  |
| AL     | 4.85  | 4.92  | 5.07  | 5.31  | 5.59  | 5.88  | 6.18  | 6.48  | 6.82  | 7.15  | 7.5   | 7.84  | 8.16  | 8.49  | 8.77  | 9.04  | 9.26  | 9.48  |
| AR     | 2.98  | 3.04  | 3.14  | 3.28  | 3.45  | 3.62  | 3.8   | 3.98  | 4.18  | 4.38  | 4.58  | 4.78  | 4.97  | 5.17  | 5.33  | 5.49  | 5.62  | 5.74  |
| AZ     | 6.83  | 7.41  | 7.98  | 8.49  | 8.99  | 9.5   | 10.04 | 10.58 | 11.18 | 11.78 | 12.4  | 13.02 | 13.62 | 14.21 | 14.74 | 15.27 | 15.69 | 16.11 |
| CA     | 38.95 | 39.95 | 41.4  | 43.57 | 46.2  | 48.83 | 51.65 | 54.48 | 57.6  | 60.73 | 63.95 | 67.17 | 70.29 | 73.41 | 76.17 | 78.93 | 81.18 | 83.43 |
| CO     | 5.45  | 5.86  | 6.24  | 6.62  | 7     | 7.38  | 7.79  | 8.2   | 8.66  | 9.11  | 9.58  | 10.04 | 10.5  | 10.95 | 11.34 | 11.74 | 12.06 | 12.38 |
| CT     | 3.59  | 3.58  | 3.66  | 3.84  | 4.07  | 4.29  | 4.53  | 4.78  | 5.04  | 5.31  | 5.59  | 5.86  | 6.13  | 6.4   | 6.63  | 6.86  | 7.05  | 7.24  |
| DC     | 0.68  | 0.72  | 0.75  | 0.8   | 0.84  | 0.9   | 0.95  | 1     | 1.06  | 1.12  | 1.18  | 1.25  | 1.3   | 1.36  | 1.42  | 1.47  | 1.52  | 1.56  |
| DE     | 0.94  | 0.99  | 1.04  | 1.1   | 1.17  | 1.23  | 1.3   | 1.37  | 1.45  | 1.52  | 1.6   | 1.68  | 1.76  | 1.83  | 1.9   | 1.96  | 2.02  | 2.07  |
| FL     | 20.22 | 21.93 | 23.46 | 24.88 | 26.31 | 27.74 | 29.27 | 30.8  | 32.5  | 34.19 | 35.93 | 37.67 | 39.35 | 41.03 | 42.51 | 43.98 | 45.18 | 46.38 |
| GA     | 10.18 | 10.74 | 11.31 | 11.93 | 12.61 | 13.28 | 14    | 14.71 | 15.51 | 16.31 | 17.13 | 17.94 | 18.73 | 19.51 | 20.19 | 20.87 | 21.4  | 21.94 |
| HI     | 1.42  | 1.42  | 1.44  | 1.5   | 1.57  | 1.65  | 1.74  | 1.82  | 1.92  | 2.01  | 2.1   | 2.2   | 2.29  | 2.38  | 2.46  | 2.54  | 2.61  | 2.67  |
| IA     | 3.12  | 3.19  | 3.29  | 3.45  | 3.63  | 3.82  | 4.01  | 4.21  | 4.43  | 4.65  | 4.87  | 5.09  | 5.3   | 5.51  | 5.69  | 5.88  | 6.02  | 6.16  |
| ID     | 1.65  | 1.82  | 1.98  | 2.1   | 2.21  | 2.33  | 2.45  | 2.57  | 2.71  | 2.85  | 2.98  | 3.12  | 3.25  | 3.39  | 3.5   | 3.61  | 3.7   | 3.79  |
| IL     | 12.86 | 12.7  | 12.87 | 13.44 | 14.22 | 15    | 15.84 | 16.68 | 17.61 | 18.54 | 19.5  | 20.45 | 21.37 | 22.3  | 23.11 | 23.92 | 24.57 | 25.23 |
| IN     | 6.61  | 6.77  | 7.02  | 7.38  | 7.79  | 8.21  | 8.66  | 9.1   | 9.6   | 10.09 | 10.6  | 11.11 | 11.59 | 12.08 | 12.5  | 12.92 | 13.26 | 13.59 |
| KS     | 2.91  | 2.92  | 2.99  | 3.13  | 3.31  | 3.48  | 3.67  | 3.86  | 4.07  | 4.28  | 4.49  | 4.7   | 4.91  | 5.11  | 5.29  | 5.47  | 5.61  | 5.74  |
| KY     | 4.43  | 4.5   | 4.65  | 4.86  | 5.12  | 5.38  | 5.65  | 5.93  | 6.23  | 6.54  | 6.85  | 7.16  | 7.45  | 7.75  | 8     | 8.25  | 8.45  | 8.64  |
| LA     | 4.66  | 4.65  | 4.72  | 4.92  | 5.19  | 5.46  | 5.74  | 6.03  | 6.34  | 6.66  | 6.98  | 7.3   | 7.6   | 7.91  | 8.18  | 8.44  | 8.65  | 8.86  |
| MA     | 6.8   | 6.99  | 7.28  | 7.67  | 8.12  | 8.58  | 9.07  | 9.56  | 10.1  | 10.64 | 11.2  | 11.76 | 12.29 | 12.83 | 13.31 | 13.78 | 14.17 | 14.56 |
| MD     | 5.99  | 6.09  | 6.29  | 6.62  | 7.01  | 7.41  | 7.83  | 8.26  | 8.73  | 9.2   | 9.68  | 10.17 | 10.63 | 11.1  | 11.52 | 11.93 | 12.26 | 12.6  |
| ME     | 1.33  | 1.35  | 1.38  | 1.44  | 1.52  | 1.59  | 1.66  | 1.74  | 1.82  | 1.9   | 1.99  | 2.08  | 2.15  | 2.23  | 2.3   | 2.37  | 2.42  | 2.47  |
| MI     | 9.93  | 10.06 | 10.35 | 10.85 | 11.46 | 12.06 | 12.72 | 13.37 | 14.1  | 14.82 | 15.56 | 16.3  | 17.01 | 17.72 | 18.34 | 18.95 | 19.44 | 19.93 |
| MN     | 5.48  | 5.7   | 5.96  | 6.27  | 6.6   | 6.94  | 7.3   | 7.66  | 8.06  | 8.46  | 8.87  | 9.28  | 9.67  | 10.06 | 10.39 | 10.73 | 11    | 11.26 |
| MO     | 6.07  | 6.17  | 6.37  | 6.68  | 7.05  | 7.43  | 7.83  | 8.23  | 8.68  | 9.12  | 9.58  | 10.04 | 10.47 | 10.91 | 11.29 | 11.67 | 11.96 | 12.26 |
| MS     | 2.99  | 2.99  | 3.04  | 3.17  | 3.33  | 3.49  | 3.67  | 3.84  | 4.03  | 4.22  | 4.41  | 4.61  | 4.79  | 4.97  | 5.13  | 5.28  | 5.4   | 5.52  |
| MT     | 1.03  | 1.08  | 1.13  | 1.18  | 1.24  | 1.3   | 1.37  | 1.43  | 1.5   | 1.57  | 1.64  | 1.71  | 1.78  | 1.84  | 1.9   | 1.96  | 2     | 2.04  |
| NC     | 10.03 | 10.61 | 11.2  | 11.81 | 12.46 | 13.11 | 13.8  | 14.49 | 15.25 | 16.02 | 16.8  | 17.58 | 18.33 | 19.07 | 19.72 | 20.36 | 20.87 | 21.37 |
| ND     | 0.75  | 0.77  | 0.8   | 0.84  | 0.88  | 0.93  | 0.97  | 1.02  | 1.07  | 1.12  | 1.18  | 1.23  | 1.28  | 1.33  | 1.37  | 1.41  | 1.44  | 1.48  |
| NE     | 1.89  | 1.95  | 2.03  | 2.14  | 2.26  | 2.38  | 2.5   | 2.63  | 2.77  | 2.92  | 3.06  | 3.21  | 3.35  | 3.49  | 3.61  | 3.73  | 3.82  | 3.92  |
| NH     | 1.34  | 1.37  | 1.42  | 1.49  | 1.56  | 1.64  | 1.73  | 1.81  | 1.9   | 1.99  | 2.09  | 2.18  | 2.27  | 2.36  | 2.43  | 2.51  | 2.57  | 2.63  |
| NJ     | 8.87  | 8.97  | 9.24  | 9.7   | 10.27 | 10.84 | 11.44 | 12.05 | 12.73 | 13.4  | 14.09 | 14.78 | 15.45 | 16.12 | 16.71 | 17.3  | 17.78 | 18.26 |
| NM     | 2.09  | 2.1   | 2.16  | 2.26  | 2.38  | 2.5   | 2.64  | 2.77  | 2.92  | 3.06  | 3.21  | 3.36  | 3.5   | 3.65  | 3.77  | 3.9   | 4     | 4.09  |
| NV     | 2.87  | 3.16  | 3.43  | 3.66  | 3.88  | 4.09  | 4.33  | 4.56  | 4.82  | 5.08  | 5.34  | 5.61  | 5.87  | 6.12  | 6.35  | 6.58  | 6.76  | 6.94  |
| NY     | 19.66 | 19.51 | 19.82 | 20.72 | 21.92 | 23.12 | 24.41 | 25.7  | 27.13 | 28.55 | 30.02 | 31.48 | 32.89 | 34.3  | 35.54 | 36.78 | 37.78 | 38.78 |
| OH     | 11.62 | 11.77 | 12.12 | 12.71 | 13.44 | 14.17 | 14.95 | 15.73 | 16.6  | 17.47 | 18.36 | 19.25 | 20.11 | 20.96 | 21.71 | 22.46 | 23.06 | 23.66 |
| OK     | 3.91  | 3.97  | 4.09  | 4.28  | 4.52  | 4.75  | 5     | 5.25  | 5.53  | 5.81  | 6.09  | 6.37  | 6.64  | 6.91  | 7.15  | 7.38  | 7.56  | 7.74  |
| OR     | 4.02  | 4.28  | 4.52  | 4.77  | 5.04  | 5.31  | 5.6   | 5.89  | 6.21  | 6.53  | 6.86  | 7.18  | 7.5   | 7.82  | 8.09  | 8.37  | 8.59  | 8.8   |
| PA     | 12.79 | 12.87 | 13.22 | 13.85 | 14.64 | 15.43 | 16.28 | 17.12 | 18.06 | 18.99 | 19.95 | 20.91 | 21.83 | 22.75 | 23.55 | 24.35 | 24.99 | 25.63 |
| RI     | 1.06  | 1.06  | 1.09  | 1.14  | 1.21  | 1.28  | 1.35  | 1.43  | 1.51  | 1.59  | 1.67  | 1.76  | 1.84  | 1.92  | 1.99  | 2.06  | 2.12  | 2.17  |
| SC     | 4.89  | 5.21  | 5.52  | 5.83  | 6.15  | 6.47  | 6.82  | 7.16  | 7.54  | 7.92  | 8.3   | 8.69  | 9.06  | 9.43  | 9.75  | 10.07 | 10.32 | 10.57 |
| SD     | 0.85  | 0.9   | 0.95  | 1     | 1.05  | 1.1   | 1.15  | 1.21  | 1.27  | 1.33  | 1.39  | 1.45  | 1.51  | 1.57  | 1.62  | 1.66  | 1.7   | 1.74  |
| TN     | 6.59  | 6.9   | 7.24  | 7.62  | 8.04  | 8.46  | 8.91  | 9.35  | 9.85  | 10.34 | 10.85 | 11.36 | 11.84 | 12.32 | 12.74 | 13.16 | 13.49 | 13.81 |
| TX     | 27.49 | 29.46 | 31.35 | 33.22 | 35.16 | 37.11 | 39.2  | 41.29 | 43.6  | 45.91 | 48.28 | 50.65 | 52.94 | 55.23 | 57.23 | 59.24 | 60.85 | 62.46 |
| UT     | 2.98  | 3.27  | 3.53  | 3.75  | 3.97  | 4.18  | 4.41  | 4.63  | 4.89  | 5.14  | 5.4   | 5.65  | 5.9   | 6.15  | 6.37  | 6.59  | 6.76  | 6.94  |
| VA     | 8.36  | 8.63  | 9     | 9.46  | 10    | 10.54 | 11.11 | 11.68 | 12.32 | 12.96 | 13.61 | 14.26 | 14.88 | 15.51 | 16.05 | 16.6  | 17.03 | 17.46 |
| VT     | 0.62  | 0.63  | 0.64  | 0.67  | 0.7   | 0.73  | 0.77  | 0.8   | 0.84  | 0.87  | 0.91  | 0.95  | 0.98  | 1.01  | 1.04  | 1.07  | 1.09  | 1.11  |
| WA     | 7.16  | 7.75  | 8.28  | 8.78  | 9.28  | 9.78  | 10.31 | 10.84 | 11.44 | 12.03 | 12.63 | 13.24 | 13.82 | 14.41 | 14.92 | 15.43 | 15.84 | 16.25 |
| WI     | 5.76  | 5.87  | 6.06  | 6.34  | 6.67  | 7.01  | 7.36  | 7.72  | 8.11  | 8.5   | 8.9   | 9.3   | 9.68  | 10.06 | 10.39 | 10.72 | 10.98 | 11.24 |
| WV     | 1.84  | 1.79  | 1.8   | 1.86  | 1.95  | 2.05  | 2.14  | 2.24  | 2.35  | 2.46  | 2.57  | 2.68  | 2.78  | 2.88  | 2.97  | 3.06  | 3.12  | 3.19  |
| WY     | 0.59  | 0.58  | 0.59  | 0.61  | 0.64  | 0.68  | 0.71  | 0.75  | 0.79  | 0.83  | 0.87  | 0.91  | 0.94  | 0.98  | 1.02  | 1.05  | 1.07  | 1.1   |

GCAM-USA High Growth scenario GDP (billion 2015 USD)

| Region | 2015 | 2020 | 2025 | 2030 | 2035 | 2040 | 2045 | 2050 | 2055 | 2060 | 2065 | 2070  | 2075  | 2080  | 2085  | 2090  | 2095  | 2100  |
|--------|------|------|------|------|------|------|------|------|------|------|------|-------|-------|-------|-------|-------|-------|-------|
| AK     | 56   | 55   | 57   | 64   | 74   | 84   | 94   | 105  | 117  | 130  | 145  | 161   | 179   | 200   | 220   | 242   | 267   | 295   |
| AL     | 197  | 215  | 241  | 276  | 319  | 363  | 411  | 459  | 514  | 574  | 643  | 718   | 801   | 894   | 992   | 1100  | 1214  | 1342  |
| AR     | 118  | 124  | 135  | 153  | 177  | 201  | 227  | 253  | 283  | 316  | 353  | 394   | 438   | 488   | 541   | 600   | 661   | 730   |
| AZ     | 292  | 349  | 415  | 486  | 564  | 646  | 733  | 824  | 927  | 1040 | 1169 | 1312  | 1468  | 1645  | 1832  | 2041  | 2260  | 2506  |
| CA     | 2536 | 2995 | 3522 | 4102 | 4773 | 5466 | 6213 | 6986 | 7859 | 8821 | 9921 | 11141 | 12479 | 13986 | 15592 | 17377 | 19254 | 21368 |
| CO     | 322  | 376  | 441  | 513  | 595  | 680  | 771  | 866  | 972  | 1090 | 1223 | 1372  | 1534  | 1717  | 1912  | 2127  | 2354  | 2609  |
| CT     | 253  | 259  | 284  | 323  | 376  | 430  | 488  | 548  | 615  | 690  | 775  | 870   | 973   | 1090  | 1214  | 1351  | 1496  | 1659  |
| DC     | 122  | 136  | 153  | 177  | 206  | 237  | 270  | 304  | 342  | 385  | 434  | 488   | 547   | 614   | 686   | 765   | 849   | 943   |
| DE     | 69   | 68   | 73   | 82   | 96   | 109  | 124  | 139  | 157  | 176  | 197  | 221   | 247   | 277   | 308   | 343   | 380   | 421   |
| FL     | 874  | 1026 | 1205 | 1401 | 1626 | 1857 | 2106 | 2363 | 2653 | 2971 | 3335 | 3738  | 4180  | 4676  | 5205  | 5793  | 6411  | 7106  |
| GA     | 501  | 575  | 657  | 758  | 878  | 1002 | 1136 | 1273 | 1428 | 1598 | 1792 | 2008  | 2242  | 2507  | 2787  | 3098  | 3424  | 3790  |
| HI     | 81   | 87   | 95   | 107  | 124  | 141  | 160  | 178  | 200  | 223  | 249  | 278   | 311   | 347   | 385   | 427   | 472   | 522   |
| IA     | 176  | 184  | 204  | 233  | 269  | 306  | 346  | 387  | 433  | 484  | 541  | 605   | 674   | 752   | 835   | 927   | 1022  | 1130  |
| ID     | 66   | 79   | 94   | 110  | 127  | 145  | 164  | 183  | 205  | 229  | 257  | 287   | 321   | 358   | 398   | 442   | 488   | 540   |
| IL     | 775  | 835  | 945  | 1087 | 1262 | 1443 | 1637 | 1838 | 2064 | 2314 | 2599 | 2915  | 3261  | 3650  | 4064  | 4524  | 5008  | 5552  |
| IN     | 324  | 355  | 398  | 457  | 530  | 605  | 685  | 768  | 862  | 965  | 1082 | 1212  | 1354  | 1514  | 1684  | 1872  | 2069  | 2290  |
| KS     | 152  | 166  | 186  | 213  | 247  | 282  | 320  | 358  | 402  | 449  | 504  | 565   | 630   | 705   | 783   | 871   | 962   | 1065  |
| KY     | 189  | 201  | 222  | 253  | 292  | 333  | 376  | 420  | 470  | 525  | 587  | 656   | 732   | 816   | 905   | 1004  | 1107  | 1223  |
| LA     | 242  | 248  | 272  | 309  | 358  | 407  | 460  | 515  | 577  | 644  | 722  | 807   | 900   | 1005  | 1116  | 1239  | 1368  | 1513  |
| MA     | 491  | 553  | 635  | 734  | 853  | 977  | 1109 | 1247 | 1401 | 1572 | 1767 | 1983  | 2220  | 2486  | 2771  | 3086  | 3418  | 3791  |
| MD     | 360  | 399  | 444  | 510  | 593  | 678  | 771  | 866  | 974  | 1093 | 1229 | 1380  | 1545  | 1731  | 1929  | 2149  | 2379  | 2640  |
| ME     | 56   | 62   | 69   | 79   | 91   | 103  | 116  | 129  | 144  | 161  | 179  | 200   | 222   | 247   | 274   | 303   | 333   | 367   |
| MI     | 460  | 517  | 594  | 685  | 795  | 907  | 1027 | 1151 | 1291 | 1445 | 1621 | 1815  | 2028  | 2267  | 2520  | 2801  | 3096  | 3428  |
| MN     | 325  | 362  | 410  | 470  | 544  | 620  | 701  | 784  | 877  | 980  | 1098 | 1227  | 1369  | 1528  | 1697  | 1884  | 2080  | 2300  |
| MO     | 288  | 309  | 352  | 405  | 469  | 535  | 606  | 679  | 762  | 853  | 957  | 1071  | 1197  | 1338  | 1487  | 1653  | 1827  | 2022  |
| MS     | 104  | 109  | 119  | 135  | 156  | 177  | 200  | 223  | 249  | 277  | 310  | 346   | 385   | 429   | 475   | 526   | 580   | 639   |
| MT     | 47   | 48   | 52   | 59   | 68   | 77   | 87   | 97   | 108  | 121  | 135  | 150   | 167   | 186   | 206   | 228   | 251   | 277   |
| NC     | 489  | 549  | 635  | 733  | 848  | 967  | 1094 | 1224 | 1371 | 1534 | 1718 | 1922  | 2145  | 2395  | 2660  | 2954  | 3261  | 3607  |
| ND     | 57   | 56   | 64   | 74   | 85   | 96   | 109  | 122  | 136  | 152  | 170  | 189   | 211   | 235   | 260   | 289   | 318   | 352   |
| NE     | 115  | 121  | 134  | 154  | 178  | 203  | 230  | 258  | 289  | 324  | 363  | 406   | 454   | 508   | 564   | 627   | 693   | 766   |
| NH     | 74   | 83   | 94   | 107  | 124  | 141  | 159  | 178  | 199  | 222  | 248  | 277   | 309   | 345   | 382   | 424   | 467   | 516   |
| NJ     | 558  | 604  | 680  | 781  | 907  | 1038 | 1178 | 1322 | 1485 | 1665 | 1870 | 2097  | 2347  | 2627  | 2926  | 3258  | 3608  | 4001  |
| NM     | 95   | 101  | 112  | 129  | 149  | 170  | 192  | 215  | 241  | 269  | 301  | 337   | 377   | 421   | 467   | 519   | 573   | 634   |
| NV     | 141  | 163  | 190  | 220  | 256  | 293  | 333  | 374  | 420  | 471  | 530  | 595   | 666   | 746   | 831   | 925   | 1025  | 1136  |
| NY     | 1431 | 1570 | 1774 | 2040 | 2368 | 2707 | 3070 | 3446 | 3870 | 4337 | 4869 | 5459  | 6106  | 6833  | 7607  | 8467  | 9370  | 10387 |
| OH     | 604  | 654  | 732  | 839  | 974  | 1112 | 1261 | 1415 | 1588 | 1779 | 1997 | 2239  | 2503  | 2800  | 3116  | 3467  | 3835  | 4249  |
| OK     | 203  | 210  | 235  | 269  | 311  | 355  | 401  | 449  | 503  | 562  | 630  | 705   | 786   | 878   | 975   | 1083  | 1196  | 1322  |
| OR     | 200  | 239  | 279  | 324  | 376  | 429  | 486  | 545  | 612  | 685  | 768  | 861   | 962   | 1076  | 1196  | 1330  | 1471  | 1629  |
| PA     | 709  | 778  | 880  | 1011 | 1173 | 1339 | 1518 | 1702 | 1910 | 2139 | 2400 | 2689  | 3004  | 3360  | 3737  | 4156  | 4595  | 5089  |
| RI     | 55   | 57   | 62   | 71   | 82   | 94   | 107  | 120  | 135  | 151  | 170  | 191   | 213   | 239   | 266   | 297   | 329   | 364   |
| SC     | 198  | 220  | 245  | 280  | 324  | 369  | 418  | 467  | 524  | 586  | 656  | 734   | 819   | 915   | 1016  | 1129  | 1246  | 1379  |
| SD     | 47   | 49   | 55   | 62   | 72   | 81   | 92   | 102  | 114  | 128  | 143  | 159   | 177   | 197   | 219   | 242   | 267   | 294   |
| TN     | 314  | 358  | 414  | 478  | 554  | 631  | 714  | 799  | 896  | 1002 | 1122 | 1256  | 1401  | 1565  | 1738  | 1931  | 2132  | 2359  |
| TX     | 1662 | 1865 | 2173 | 2522 | 2930 | 3351 | 3803 | 4270 | 4797 | 5378 | 6041 | 6776  | 7581  | 8487  | 9449  | 10519 | 11640 | 12903 |
| UT     | 148  | 178  | 214  | 250  | 290  | 331  | 375  | 420  | 471  | 528  | 592  | 663   | 741   | 828   | 922   | 1025  | 1134  | 1256  |
| VA     | 475  | 526  | 606  | 700  | 812  | 927  | 1051 | 1178 | 1321 | 1480 | 1660 | 1859  | 2078  | 2323  | 2584  | 2873  | 3176  | 3517  |
| VT     | 30   | 32   | 35   | 40   | 46   | 52   | 59   | 65   | 73   | 81   | 90   | 100   | 111   | 123   | 136   | 150   | 165   | 181   |
| WA     | 463  | 588  | 736  | 871  | 1010 | 1153 | 1307 | 1466 | 1645 | 1841 | 2066 | 2315  | 2587  | 2893  | 3219  | 3581  | 3961  | 4389  |
| WI     | 298  | 330  | 376  | 432  | 499  | 568  | 641  | 716  | 801  | 894  | 1000 | 1117  | 1245  | 1388  | 1540  | 1709  | 1886  | 2084  |
| WV     | 73   | 78   | 89   | 102  | 117  | 133  | 150  | 167  | 187  | 208  | 232  | 258   | 287   | 320   | 354   | 392   | 431   | 475   |
| WY     | 41   | 41   | 43   | 49   | 57   | 65   | 73   | 82   | 92   | 102  | 115  | 128   | 143   | 159   | 177   | 196   | 217   | 239   |

**Table SM2: GCAM-USA Grid Regions**

| <u>Grid Region</u>     | <u>States in Grid</u>              |
|------------------------|------------------------------------|
| Alaska grid            | AK                                 |
| California grid        | CA                                 |
| Central East grid      | IN, KY, MI, OH, WV                 |
| Central Northeast grid | IL, MO, WI                         |
| Central Northwest grid | IA, MN, ND, NE, SD                 |
| Central Southwest grid | KS, OK                             |
| Florida grid           | FL                                 |
| Hawaii grid            | HI                                 |
| Mid-Atlantic grid      | DC, DE, MD, NJ, PA                 |
| New England grid       | CT, MA, ME, NH, RI, VT             |
| New York grid          | NY                                 |
| Northwest grid         | ID, MT, NV, OR, UT, WA             |
| Southeast grid         | AL, AR, GA, LA, MS, NC, SC, TN, VA |
| Southwest grid         | AZ, CO, NM, WY                     |
| Texas grid             | TX                                 |



**Table SM3: Thermal power plant cooling systems**

|                                              | <b>once through</b> | <b>seawater</b> | <b>recirculating</b> | <b>cooling pond</b> | <b>dry cooling</b> | <b>dry hybrid</b> |
|----------------------------------------------|---------------------|-----------------|----------------------|---------------------|--------------------|-------------------|
| <b>coal (conv pul)</b>                       | historical only     | coastal only    | available            | available           | available          | NA                |
| <b>coal (conv pul CCS)</b>                   | historical only     | coastal only    | available            | NA                  | available          | NA                |
| <b>coal / biomass (IGCC) / (IGCC CCS)</b>    | historical only     | coastal only    | available            | NA                  | available          | NA                |
| <b>gas / refined liquids (steam/CT)</b>      | historical only     | coastal only    | available            | available           | available          | NA                |
| <b>gas / refined liquids (CC) / (CC CCS)</b> | historical only     | coastal only    | available            | NA                  | available          | NA                |
| <b>biomass (conv)</b>                        | historical only     | coastal only    | available            | available           | available          | NA                |
| <b>nuclear</b>                               | historical only     | coastal only    | available            | available           | NA                 | NA                |
| <b>geothermal</b>                            | NA                  | NA              | available            | NA                  | NA                 | available         |
| <b>CSP</b>                                   | NA                  | NA              | available            | NA                  | NA                 | available         |

- Historical only: New fresh water once-through cooling systems are not available for future installation, consistent with EPA regulation.
- Coastal only: Seawater cooling systems are only available in coastal states.
- Available: Available for future installation, with the following conditions. For generation technologies which are deployed historically in a given state, generation technology / cooling system combinations which do not exist historically will not be built in the future (e.g., a state with conventional coal but no coal + cooling pond plants won't build that combination in the future). For generation technology types which did not deploy historically in a given state, all available cooling technologies.
- NA: Not available for future installation.

190 **Table SM4: Key Input Data Sources for GCAM-USA Calibration**

| <u>File Name</u>                     | <u>Description</u>                                                                                                           |
|--------------------------------------|------------------------------------------------------------------------------------------------------------------------------|
| AEO_2020_elec_gen_hydro.csv          | AEO 2020 Hydropower Electricity Generation (case = Reference case; region = United States)                                   |
| AEO_2019_regional_pcGDP_ratio.csv    | AEO 2019 Change in Per-Capita Gross Regional Product by US Census Division from 1990-2050                                    |
| BEA_GDP_87_96_97USD_state.csv        | Bureau of Economic Analysis Real GDP by State from 1987-1996                                                                 |
| BEA_GDP_97_18_12USD_state.csv        | Bureau of Economic Analysis Real GDP by State from 1997-2018                                                                 |
| CBECS_2012.csv                       | U.S. Energy Information Administration's Commercial Buildings Energy Consumption Survey 2012                                 |
| Census_pop.csv                       | U.S. Census Bureau Population by State from 1970-2018                                                                        |
| EIA_860_generators_existing_2018.csv | EIA Form 860 Data for 2018 - Generators 2018 capacity data                                                                   |
| EIA_860_generators_retired_2018.csv  | EIA Form 860 Data for 2018 - Schedule 3; 'Generator Data' (Retired & Canceled Units Only)                                    |
| EIA_923_generator_gen_fuel_2018.csv  | EIA Form 923 Data for 2018 - Plant-Level Electricity Generation Data in MWh                                                  |
| EIA_AEO_Tab4.csv                     | EIA Annual Energy Outlook Table 4 (1996-2018 editions): Residential energy use for 1993-2015 base years                      |
| EIA_AEO_Tab5.csv                     | EIA Annual Energy Outlook Table 5 (2002-2018 editions) - Floorspace and building energy consumption for 1999-2015 base years |
| EIA_biodiesel_Mgal.yr.csv            | Biodiesel producers and production capacity by state in March 2014, from EIA                                                 |
| EIA_elec_gen_hydro.csv               | U.S. EIA Historical Electricity Generation from Hydropower by State, from 1990-2016                                          |
| EIA_elect_td_ownuse.csv              | EIA State Electricity Profiles 2018                                                                                          |
| EIA_state_energy_prices.csv          | EIA State Electricity Profiles 2012 - Table E1. Primary Energy Electricity and Total Energy Price Estimates                  |
| EIA_use_all_Bbtu.csv                 | EIA State Energy Data System (SEDS) Energy Consumption Data (in BBTU) from 1960-2017                                         |
| RECS_2015.csv                        | U.S. Energy Information Administration's Residential Energy Consumption Survey 2015                                          |
| SEDS_refining_feedstock_prod.csv     | Coal production and Natural gas marketed production for 2017 in Billion BTU                                                  |

**Table SM5: Share Weight Assumptions for Key Sectors**

During GCAM-USA's calibration routine, GCAM uses the cost of each subsector or technology to estimate the (unobserved) logit share weight parameters, ensuring that historically observed outcomes are reproduced (Calvin et al., 2019). Technology shares are derived from the historical (calibration) data, leaving share weights as the unknown parameter in the logit equation that is solved for. These share weight parameters capture unobserved factors, including preferences, which impact economic choice but aren't explicitly represented in the model's choice indicator (cost). The dominant technology (technology with the highest share historically) receives a calibrated share weight of 1.

In future model periods, exogenous assumptions are made about whether to maintain or phase out these calibrated share weights. Most commonly, share weights are held constant at their final (2015) calibration values. Share weights are also often converged to a common value, usually 1, in some future model period. In a case where all subsectors or technologies within a node have the same share weight (such as the case where all share weights are converged to 1), the subsector (often-fuel level) or technology competition is based solely on cost, with no non-modeled factors influencing the competition. Because share weights are mostly maintained at their calibration values or slowly phased out, the preferences and other non-modeled factors captured by GCAM's calibration routine continue to influence model decisions in future model periods (most strongly in initial model years). Table SM5, below, presents future share weight assumptions for key sectors in GCAM-USA. Note that often sectors contain only one subsector, or subsectors contain only one technology, in which case there is no competition in that nest and share weight assumptions do not impact solution (unless the assumption is a zero share weight, which precludes production from that subsector/technology).

| <u>Sector</u>              | <u>Regional Scale</u> | <u>Subsector</u>                                               | <u>Subsector Share Weight</u>                   | <u>Technology</u>                                                                                                                                                                         | <u>Technology Share Weight</u>                                                                                                           |
|----------------------------|-----------------------|----------------------------------------------------------------|-------------------------------------------------|-------------------------------------------------------------------------------------------------------------------------------------------------------------------------------------------|------------------------------------------------------------------------------------------------------------------------------------------|
| Refining - Oil             | State                 |                                                                |                                                 | Oil Refining                                                                                                                                                                              | Fixed at calibrated values through 2100. This implies that states with no oil refineries historically will not refine oil in the future. |
| Refining - Biomass Liquids |                       |                                                                |                                                 | Corn Ethanol<br>Cellulosic Ethanol<br>Cellulosic Ethanol CCS level 1<br>Cellulosic Ethanol CCSS level 2<br>Biodiesel<br>FT Biofuels<br>FT Biofuels CCS level 1<br>FT Biofuels CCS level 2 | Interpolate from calibrated values to 1 in 2100 except for cellulosic ethanol (1 in 2025) and FT biofuels (1 in 2020)                    |
| Refining - Coal to Liquids |                       |                                                                |                                                 | Coal to Liquids<br>Coal to Liquids CCS level 1<br>Coal to Liquids CCS level 2                                                                                                             | Coal to Liquids without CCS assumed unavailable; Coal to Liquids CCS technologies interpolate to 1 in 2050                               |
| Gas Processing             | USA                   | Natural Gas<br>Biomass<br>Gasification<br>Coal<br>Gasification | Interpolate from calibrated values to 1 in 2100 |                                                                                                                                                                                           |                                                                                                                                          |

| <u>Sector</u>                    | <u>Regional Scale</u> | <u>Subsector</u>                                                     | <u>Subsector Share Weight</u>                                                                                                                                                                                | <u>Technology</u>                                                                                                             | <u>Technology Share Weight</u>          |
|----------------------------------|-----------------------|----------------------------------------------------------------------|--------------------------------------------------------------------------------------------------------------------------------------------------------------------------------------------------------------|-------------------------------------------------------------------------------------------------------------------------------|-----------------------------------------|
| Electricity (investment)         | State                 | Coal                                                                 | Fixed at calibrated values through 2100                                                                                                                                                                      |                                                                                                                               |                                         |
|                                  |                       | Gas                                                                  | Interpolate from calibrated values to 1 in 2030, then fixed at 1 from through 2100; Exception is HI which is fixed at 0 from 2015 through 2100                                                               |                                                                                                                               |                                         |
|                                  |                       | Refined Liquids                                                      | Fixed at 0 from 2015 through 2100<br>Exception is HI, which is fixed at calibration values from 2015 through 2100                                                                                            |                                                                                                                               |                                         |
|                                  |                       | Solar Wind                                                           | Interpolate from calibrated values to 1 in 2030, then fixed at 1 through 2100                                                                                                                                |                                                                                                                               |                                         |
|                                  |                       | Nuclear                                                              | Zero share-weights throughout the century for states with no nuclear in base year. For states with nuclear in the base year, zero shareweights from 2015 to 2030; from 2035 onward, fixed at 1 through 2100. |                                                                                                                               |                                         |
|                                  |                       | Biomass                                                              | Interpolate from calibrated values to 1 in 2100.                                                                                                                                                             |                                                                                                                               |                                         |
|                                  |                       | Geothermal                                                           | Unavailable for new investment after 2015                                                                                                                                                                    |                                                                                                                               |                                         |
| Building - Heating               | State                 | Biomass<br>Electricity<br>Gas<br>Refined Liquids                     | Fixed at calibrated values through 2100, except for refined liquids which is phased to near-zero (0.1) availability by 2050                                                                                  | Electric Furnace vs. Electric Heat Pump;<br>Gas Furnace vs. Gas Furnace Hi-Eff;<br>Fuel Furnace vs. Fuel Furnace Hi-Eff;      | Set to 1 in all future model periods    |
| Building - Cooling               | State                 | Electricity<br>Gas                                                   | Fixed at calibrated values through 2100                                                                                                                                                                      | air conditioning<br>air conditioning hi-eff                                                                                   | Set to 1 in all future model periods    |
| Industry - Energy                | State                 | Biomass<br>Coal<br>Electricity<br>Gas<br>Hydrogen<br>Refined Liquids | Fixed at calibrated values through 2100, except for hydrogen which is interpolated to 1 in 2050, then fixed at 1 through 2100                                                                                | Biomass (no cogen vs. cogen)<br>Coal (no cogen vs. cogen)<br>Gas (no cogen vs. cogen)<br>Refined Liquids (no cogen vs. cogen) | Fixed at calibrated values through 2100 |
| Industry - Feedstocks            | State                 | Coal<br>Gas<br>Refined Liquids                                       | Fixed at calibrated values through 2100                                                                                                                                                                      |                                                                                                                               |                                         |
| Industry - Cement (Process Heat) | State                 | Biomass<br>Coal<br>Gas<br>Refined Liquids                            | Fixed at calibrated values through 2100                                                                                                                                                                      |                                                                                                                               |                                         |

| <u>Sector</u>                                               | <u>Regional Scale</u> | <u>Subsector</u>                                                                  | <u>Subsector Share Weight</u>           | <u>Technology</u>                                                                                                                    | <u>Technology Share Weight</u>                                                                                                                                                                                      |
|-------------------------------------------------------------|-----------------------|-----------------------------------------------------------------------------------|-----------------------------------------|--------------------------------------------------------------------------------------------------------------------------------------|---------------------------------------------------------------------------------------------------------------------------------------------------------------------------------------------------------------------|
| Transport - Freight                                         | State                 | Road<br>Rail<br>Shipping                                                          | Fixed at calibrated values through 2100 |                                                                                                                                      |                                                                                                                                                                                                                     |
| Transport - Road Freight                                    | State                 | Light truck<br>Medium truck<br>Heavy truck                                        | Fixed at calibrated values through 2100 | Liquids<br>NG (natural gas)                                                                                                          | Liquids - fixed at calibrated values through 2100;<br>NG - interpolate to 1 in 2050, then fixed at 1 through 2100                                                                                                   |
| Transport - Passenger                                       | State                 | Walk<br>Cycle<br>Light Duty Vehicle<br>Bus<br>Rail<br>High-Speed Rail<br>Aviation | Fixed at calibrated values through 2100 |                                                                                                                                      |                                                                                                                                                                                                                     |
| Transport - Passenger Vehicles                              | State                 | Car<br>Large Car and Truck                                                        | Fixed at calibrated values through 2100 | Liquids<br>Hybrid Liquids<br>BEV<br>FCEV<br>NG (natural gas)                                                                         | Liquids - fixed at calibrated values through 2100s;<br>Hybrid Liquids - set to 1 from 2020 through 2100;<br>BEV - interpolate to 1 in 2050, then fixed at 1 through 2100;<br>FCEV and NG - interpolate to 1 in 2100 |
| Animal Agriculture (Beef, Dairy, Pork, Poultry, Sheep/Goat) | USA                   |                                                                                   |                                         | (feed types)<br>FodderHerb_Residue<br>Pasture_FodderGrass<br>FeedCrops<br>Scavenging_Other                                           | Fixed at calibrated values through 2100                                                                                                                                                                             |
| Feed Crops                                                  | USA                   |                                                                                   |                                         | Corn<br>FiberCrop<br>MiscCrop<br>OilCrop<br>OtherGrain<br>PalmFruit<br>Rice<br>RootTuber<br>SugarCrop<br>Wheat<br>DDGS and feedcakes | Fixed at calibrated values through 2100, except for DDGS and feedcakes which is not available until 2020                                                                                                            |

Supplementary Figure SF1: Energy System CO2 Emissions by Scenario

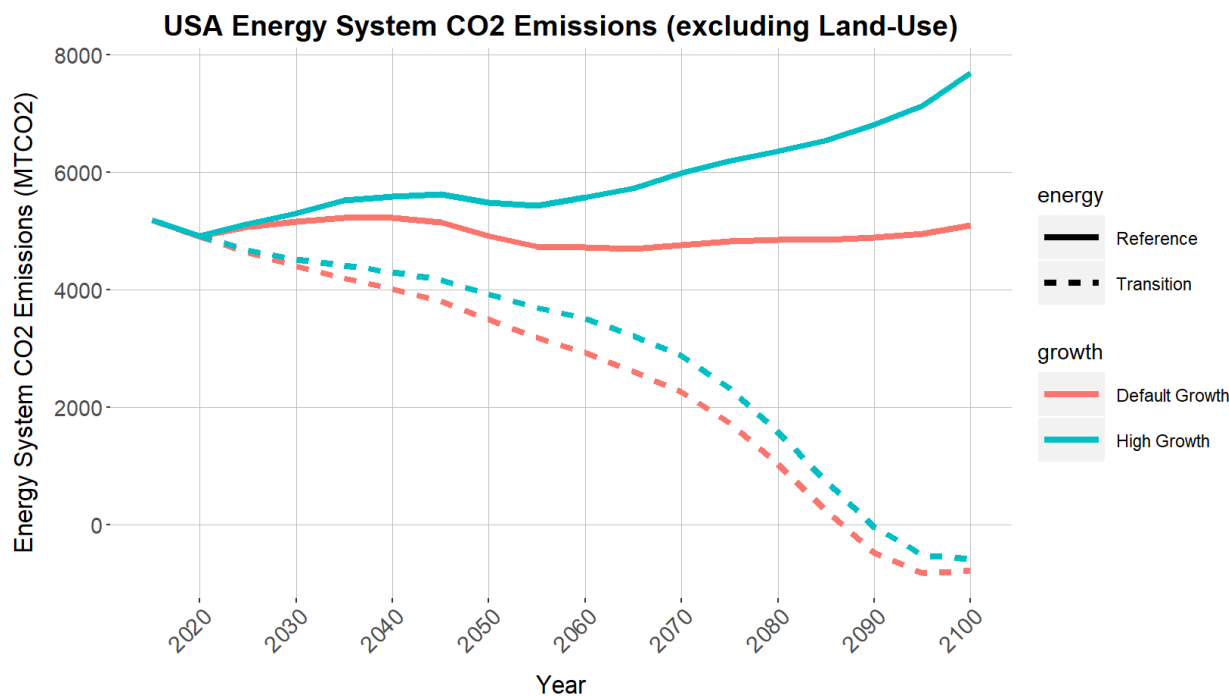

Figure SF1. Energy system CO2 emissions by scenario.

Supplementary Figure SF2: Passenger Transportation Electrification Rate (Percent of Passenger Miles Traveled)

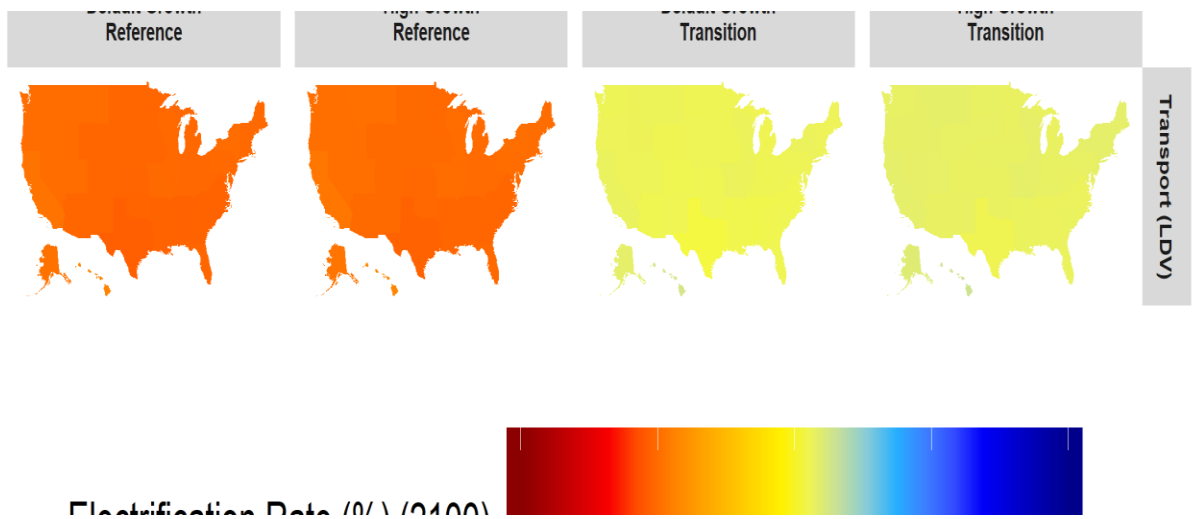

Figure SF2. Battery electric vehicle (BEV) share of passenger vehicle transportation service (passenger miles traveled) by scenario in 2100.

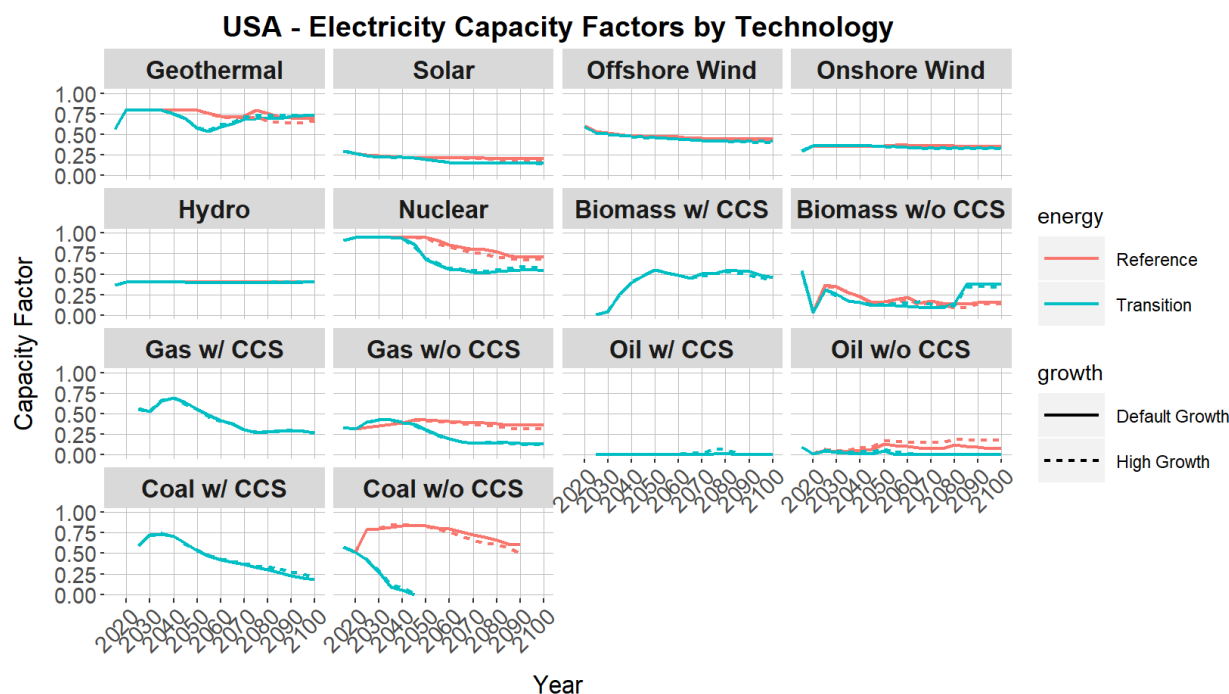

Figure SF3. USA average electric power capacity factors by technology and scenario.

**Supplementary Figure SF4: Water Resource Curves**

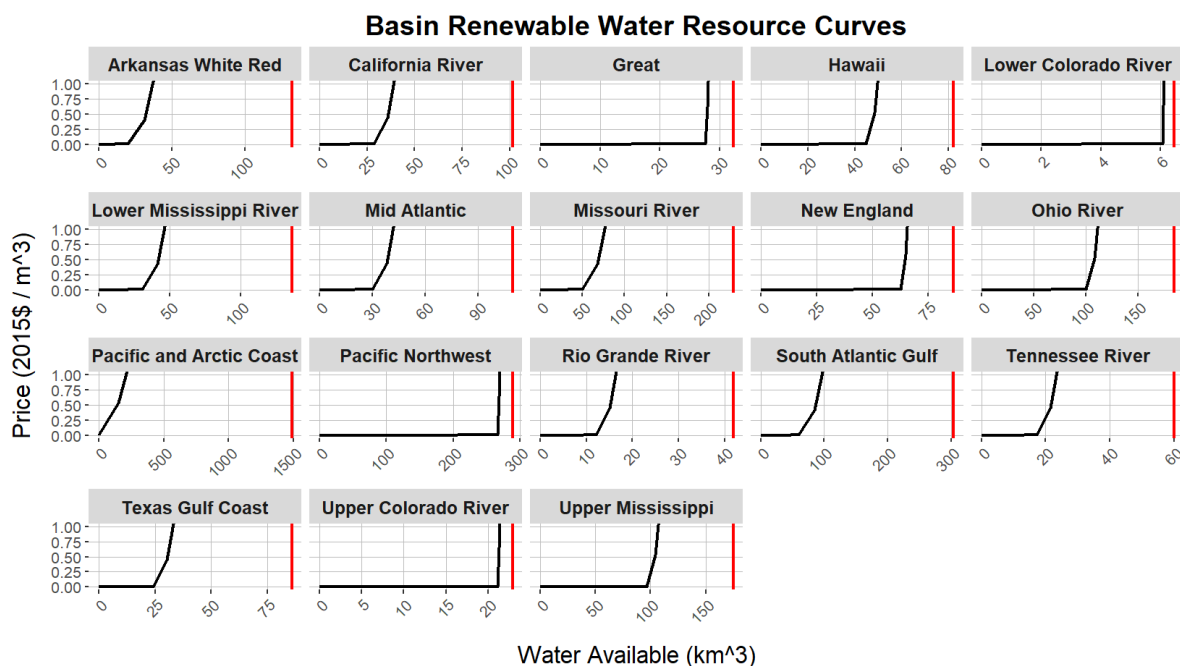

235 **Figure SF4a. Renewable water resource curves by river basin. The black line represents the resource curve at prices at or below \$1/m<sup>3</sup>; the red line represents the maximum resource potential (some basins have significant potential available at higher prices). Note that these volumes represent annual renewable resource potential.**

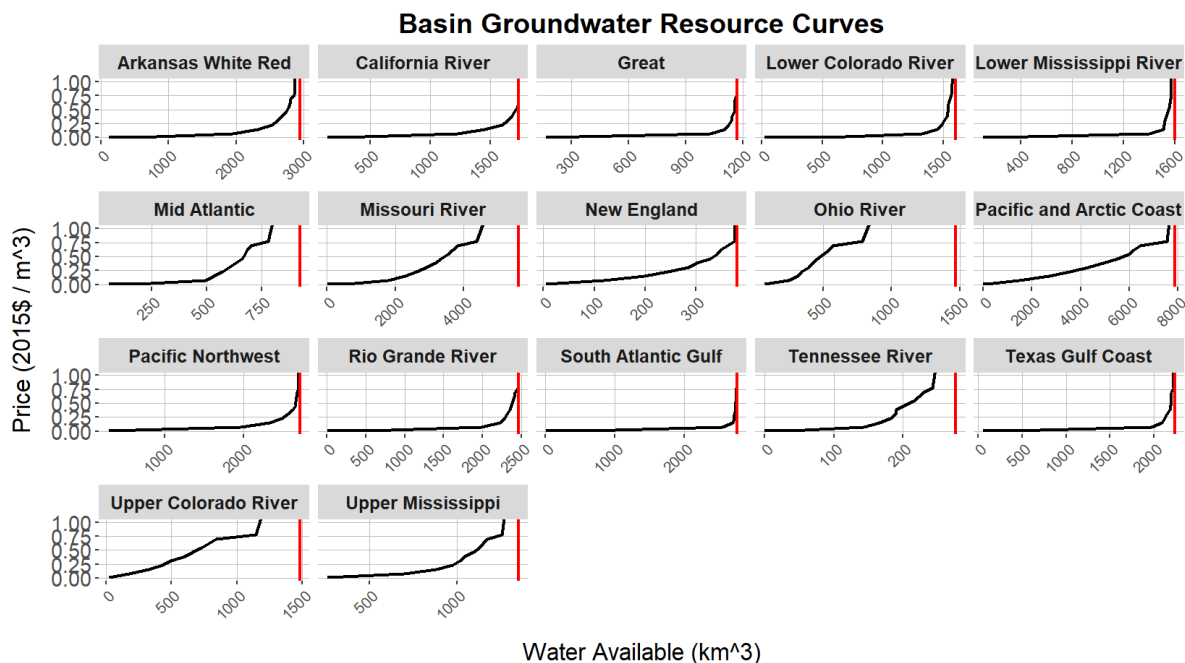

Figure SF4b. Groundwater resource curves by river basin. The black line represents the resource curve at prices at or below  $\$1/\text{m}^3$ ; the red line represents the maximum resource potential (some basins have significant potential available at higher prices). Note that these volumes represent depletable potential; once any volume is extracted, it is consumed and not available in the future.

Supplementary Figure SF5: Basin-Level Shadow Price of Water

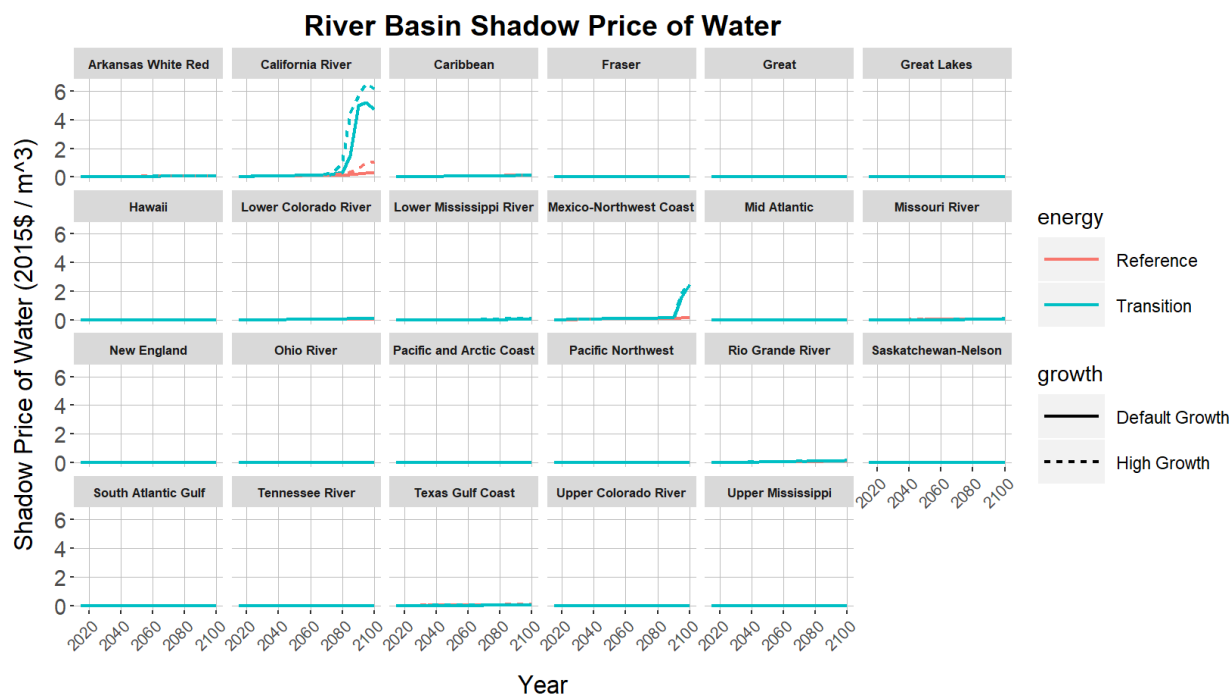

Figure SF5. Shadow price of water by river basin and scenario. Note that GCAM-USA's water prices represent a shadow price on water – the intention is not to predict real-world consumer prices, but to reflect water scarcity and provide a



**price signal to water consuming sectors when basins face water scarcity and the marginal water demand is provided by expensive ground water extraction or desalination (where available).**

250

Supplementary Figure SF6: Change in Crop Land Allocation by Scenario and Basin (2100 relative to 2015)

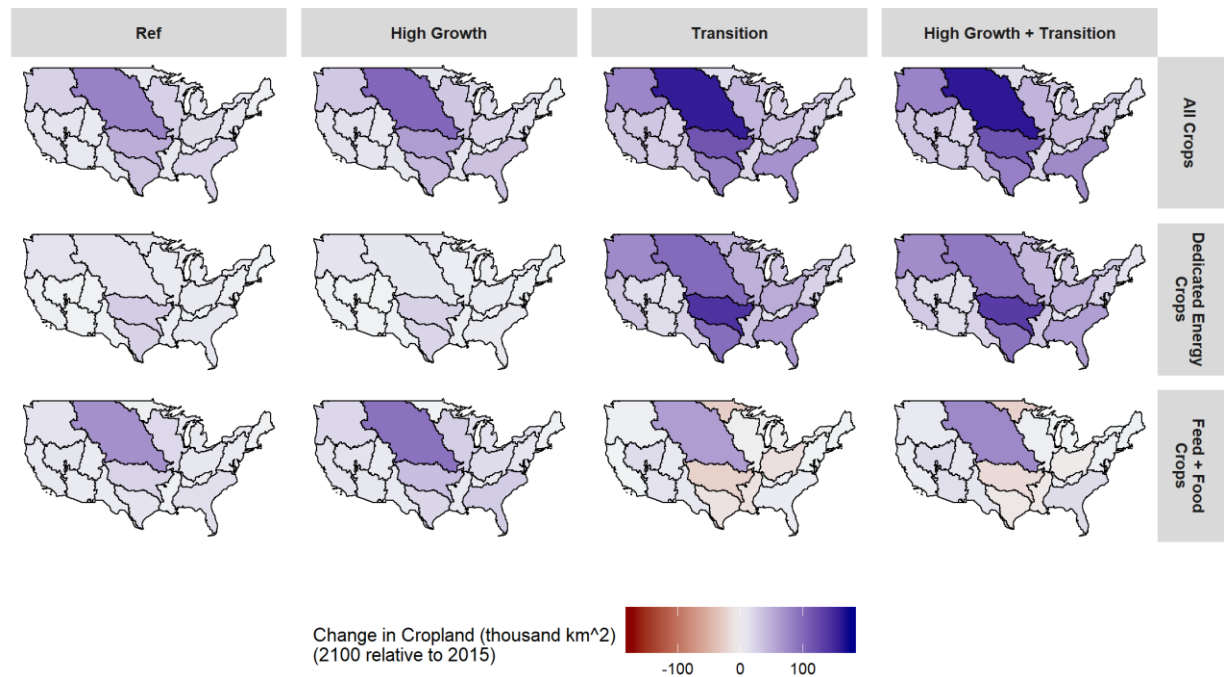

Figure SF6a. Absolute change in cropland allocation in 2100, relative to 2015, by water basin, scenario, and crop type (distinguishing between traditional food + feed crops and dedicated bioenergy crops). Red shades indicate a reduction in cropland allocation, while blue shades indicate an increase in cropland.

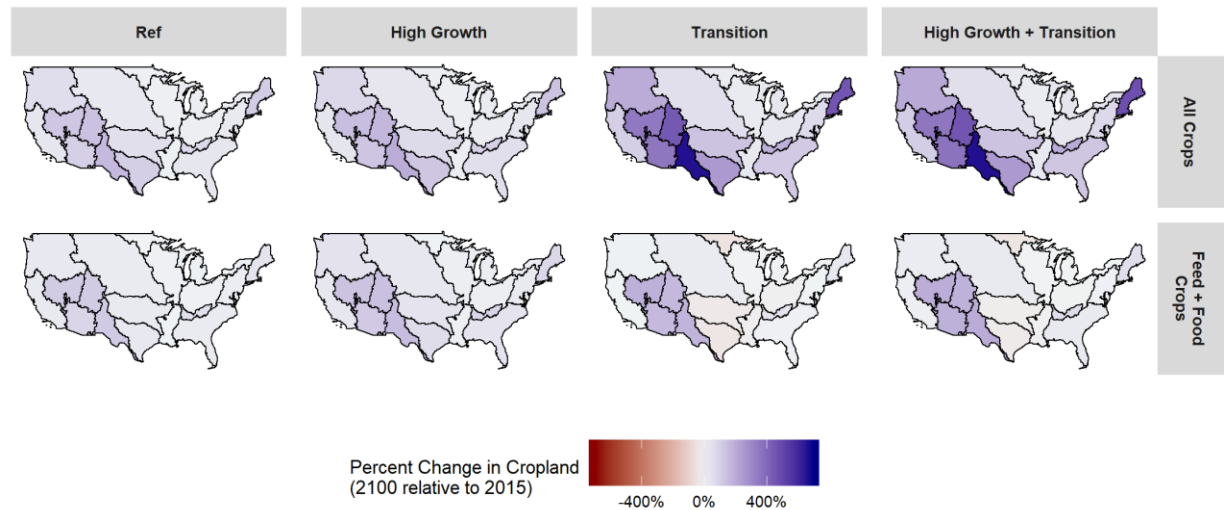

Figure SF6b. Percentage change in cropland allocation in 2100, relative to 2015, by water basin, scenario, and crop type (distinguishing between traditional food + feed crops and dedicated bioenergy crops). Red shades indicate a reduction in cropland allocation, while blue shades indicate an increase in cropland. Dedicated Energy Crops are missing from this plot because there is no dedicated energy cropland in 2015 (percent change is INF).

### **Additional References**

- 265 Binsted, M., Iyer, G., Cui, R., Zarrar Khan, Dorheim, K., and Clarke, L.: Evaluating long-term model-based scenarios of the energy system, *Energy Strategy Reviews*, 32, 2020.
